# Supplementary material for: ApoE e2 and aging-related outcomes in 379,000 UK Biobank participants
Source: Aging (Albany NY). 2020 Jun 8;12(12):12222–33. doi: 10.18632/aging.103405 (PMC7343499; doi:10.18632/aging.103405)
Supplement: Supplementary Table 1 [file aging-12-103405-s001..xlsx]

## Sheet: Table S1 aging trait summary
Table S1 A Summary of Aging Traits for the ApoE Genotypes Separately
summary: frequency (percentage) or median (first quartile, third quartile)
Category	Trait	e3e3: n	e3e3: summary	e2e2: n	e2e2: summary	e2e3: n	e2e3: summary	e2e4: n	e2e4: summary	e3e4: n	e3e4: summary	e4e4: n	e4e4: summary	power
Biomarker	Alanine aminotransferase	211773	20.24 (15.48, 27.59)	2270	20.88 (15.77, 28.15)	44356	20.26 (15.46, 27.6)	9038	19.83 (15.35, 26.71)	85830	19.96 (15.33, 26.9)	8647	19.68 (15.09, 26.39)	>0.99
Biomarker	Albumin	193759	45.25 (43.54, 46.96)	2110	44.97 (43.35, 46.76)	40788	45.18 (43.49, 46.89)	8292	45.24 (43.5, 46.96)	78760	45.21 (43.51, 46.95)	7904	45.21 (43.5, 46.96)	>0.99
Biomarker	Alkaline Phosphatase	211828	80.4 (67.3, 95.9)	2276	83.55 (69.8, 98.7)	44376	80.9 (67.7, 96.4)	9045	79.9 (67, 94.8)	85881	79.6 (66.6, 94.9)	8655	79 (66.2, 93.9)	>0.99
Biomarker	Apolipoprotein A	192645	1.52 (1.36, 1.7)	2077	1.55 (1.39, 1.74)	40444	1.55 (1.38, 1.74)	8237	1.52 (1.35, 1.71)	78371	1.49 (1.33, 1.68)	7852	1.48 (1.31, 1.66)	>0.99
Biomarker	Apolipoprotein B	211092	1.03 (0.88, 1.18)	2020	0.6 (0.51, 0.71)	44111	0.9 (0.77, 1.04)	8994	0.96 (0.82, 1.11)	85484	1.08 (0.92, 1.24)	8592	1.11 (0.95, 1.28)	>0.99
Biomarker	Aspartate Aminotransferase	211052	24.3 (21, 28.8)	2264	24.7 (21.3, 29.2)	44206	24.4 (21, 28.8)	9006	24.4 (21.1, 28.6)	85564	24.4 (21, 28.8)	8613	24.7 (21.1, 29)	> 0.99
Biomarker	Calcium	193711	2.38 (2.32, 2.44)	2111	2.37 (2.32, 2.43)	40763	2.38 (2.32, 2.44)	8291	2.38 (2.32, 2.44)	78717	2.38 (2.32, 2.44)	7899	2.37 (2.32, 2.43)	>0.99
Biomarker	Cholesterol	211820	5.69 (4.96, 6.44)	2272	4.71 (4.01, 5.54)	44383	5.3 (4.64, 6)	9046	5.49 (4.79, 6.21)	85872	5.85 (5.07, 6.64)	8655	5.95 (5.16, 6.78)	>0.99
Biomarker	C-Reactive Protein	211378	1.43 (0.71, 2.94)	2266	1.48 (0.75, 3.03)	44291	1.51 (0.76, 3)	9025	1.18 (0.6, 2.51)	85689	1.07 (0.53, 2.25)	8623	0.76 (0.39, 1.63)	>0.99
Biomarker	Creatinine	211724	70.5 (61.5, 80.9)	2276	70.05 (61.7, 80.32)	44357	70.8 (61.9, 81.2)	9039	70.2 (61.2, 80.7)	85823	70.2 (61.2, 80.5)	8650	69.6 (60.7, 80)	>0.99
Biomarker	Cystatin C	211803	0.89 (0.81, 0.98)	2275	0.9 (0.81, 0.99)	44380	0.89 (0.81, 0.99)	9043	0.88 (0.8, 0.98)	85861	0.88 (0.8, 0.98)	8657	0.88 (0.8, 0.97)	>0.99
Biomarker	Direct Bilirubin	180357	1.61 (1.3, 2.09)	1999	1.76 (1.4, 2.26)	38415	1.64 (1.32, 2.14)	7653	1.64 (1.31, 2.12)	72518	1.6 (1.3, 2.07)	7231	1.61 (1.3, 2.08)	> 0.99
Biomarker	Gamma Glutamyltransferase	211713	26.3 (18.5, 41.2)	2276	26.65 (18.6, 42)	44346	26.2 (18.4, 40.5)	9040	25.7 (18.3, 40.2)	85836	26 (18.4, 40.5)	8651	25.5 (18.4, 39.7)	>0.99
Biomarker	Glucose	193536	4.93 (4.6, 5.31)	2109	4.91 (4.57, 5.33)	40746	4.93 (4.6, 5.32)	8284	4.92 (4.61, 5.29)	78653	4.93 (4.6, 5.31)	7895	4.92 (4.58, 5.31)	>0.99
Biomarker	Glycated Hemoglobin (HbA1c)	211780	35.2 (32.7, 37.8)	2290	35.1 (32.7, 37.7)	44373	35.1 (32.7, 37.7)	9068	35.1 (32.7, 37.6)	85756	35.1 (32.6, 37.6)	8592	35 (32.6, 37.5)	>0.99
Biomarker	HDL Cholesterol	193690	1.41 (1.18, 1.68)	2109	1.41 (1.17, 1.71)	40774	1.43 (1.19, 1.72)	8289	1.4 (1.16, 1.69)	78708	1.38 (1.16, 1.66)	7899	1.37 (1.14, 1.64)	>0.99
Biomarker	IGF-1	210670	21.23 (17.49, 24.8)	2263	21.27 (17.19, 24.7)	44131	21.18 (17.5, 24.79)	8980	21.36 (17.6, 24.92)	85430	21.35 (17.66, 24.86)	8603	21.48 (17.75, 24.93)	>0.99
Biomarker	LDL direct	211421	3.55 (2.99, 4.13)	2268	2.55 (2.06, 3.17)	44298	3.17 (2.67, 3.71)	9023	3.34 (2.81, 3.9)	85714	3.69 (3.1, 4.3)	8642	3.77 (3.17, 4.4)	> 0.99
Biomarker	Lipoprotein A	169338	21.02 (9.7, 60.68)	1733	10.4 (6.08, 53.3)	34778	17.01 (8.3, 60.78)	7072	15.9 (8, 59.59)	68431	20.3 (9.41, 58.8)	6818	18.56 (8.9, 55.88)	>0.99
Biomarker	Oestradiol	33924	314.05 (216.5, 535.3)	384	327.55 (222.57, 528.72)	6946	309.85 (213.3, 522.27)	1471	316.4 (216.1, 534.65)	13746	316.75 (217.5, 538.53)	1384	303.55 (215.57, 524.83)	0.65
Biomarker	Phosphate	193422	1.16 (1.05, 1.27)	2103	1.16 (1.05, 1.27)	40686	1.16 (1.05, 1.26)	8280	1.17 (1.05, 1.27)	78591	1.16 (1.05, 1.26)	7896	1.16 (1.05, 1.26)	>0.99
Biomarker	Rheumatoid Factor	18801	16.7 (12.3, 27.7)	197	15.6 (11.8, 27.2)	4095	16.4 (12.2, 26.6)	759	16.7 (12.4, 28.7)	7624	16.7 (12.3, 27.8)	708	16.3 (12.2, 28.6)	0.27
Biomarker	Sex Hormone Binding Globulin	191921	45.38 (32.56, 64.06)	2093	46.09 (34, 64.3)	40408	45.77 (32.9, 64.35)	8209	46.02 (33.58, 64.54)	77963	45.95 (32.89, 64.61)	7823	46.79 (33.61, 66.47)	>0.99
Biomarker	Testosterone	192110	4.63 (1.02, 11.64)	2063	3.34 (1, 11.9)	40242	5.02 (1.02, 11.74)	8216	4.91 (1, 11.74)	77676	5.05 (1.02, 11.67)	7836	4.66 (1.01, 11.67)	> 0.99
Biomarker	Total Bilirubin	210934	8.09 (6.44, 10.43)	2268	8.08 (6.38, 10.22)	44189	8.03 (6.42, 10.41)	9006	8.06 (6.41, 10.43)	85522	8.12 (6.48, 10.48)	8612	8.25 (6.56, 10.66)	>0.99
Biomarker	Total Protein	193558	72.21 (69.65, 74.89)	2105	72.14 (69.5, 74.83)	40736	72.12 (69.61, 74.78)	8286	72.18 (69.69, 74.86)	78672	72.16 (69.63, 74.87)	7896	72.14 (69.62, 74.83)	>0.99
Biomarker	Triglycerides	211659	1.46 (1.03, 2.1)	2275	1.85 (1.26, 2.73)	44336	1.55 (1.08, 2.26)	9039	1.59 (1.11, 2.34)	85803	1.51 (1.06, 2.19)	8647	1.56 (1.09, 2.29)	>0.99
Biomarker	Urate	211564	303.5 (250.9, 361.2)	2271	300.4 (249.8, 355.15)	44319	304.2 (251.4, 362.4)	9031	302.3 (250.25, 358.8)	85774	302 (249.7, 360.5)	8646	298.1 (245.9, 357.3)	>0.99
Biomarker	Urea	211689	5.29 (4.52, 6.17)	2276	5.28 (4.5, 6.13)	44333	5.31 (4.53, 6.16)	9039	5.26 (4.47, 6.13)	85822	5.27 (4.5, 6.14)	8651	5.22 (4.47, 6.08)	>0.99
Biomarker	Vitamin D	202961	47.9 (33.5, 63.2)	2205	49.8 (36, 65.7)	43477	48.5 (34.1, 63.8)	8780	48.5 (33.5, 63.7)	80790	47.6 (33.3, 62.8)	8040	46.9 (32.5, 62.73)	>0.99
Chronic Pain	Back Pain 3+ Months	221339	38660 (17.47%)	2393	450 (18.8%)	46350	8181 (17.65%)	9451	1620 (17.14%)	89666	15084 (16.82%)	8982	1503 (16.73%)	>0.99
Chronic Pain	Hip Pain 3+ Months	221570	19275 (8.7%)	2392	220 (9.2%)	46405	4120 (8.88%)	9464	804 (8.5%)	89746	7677 (8.55%)	8996	781 (8.68%)	>0.99
Chronic Pain	Knee Pain 3+ Months	221442	36737 (16.59%)	2396	420 (17.53%)	46367	7788 (16.8%)	9465	1552 (16.4%)	89706	14671 (16.35%)	8991	1438 (15.99%)	>0.99
Dis - Priimary	Anemia	222218	6360 (2.86%)	2398	71 (2.96%)	46534	1284 (2.76%)	9490	265 (2.79%)	90013	2673 (2.97%)	9021	223 (2.47%)	>0.99
Dis - Priimary	Atrial Fibrillation	222218	10080 (4.54%)	2398	131 (5.46%)	46534	2044 (4.39%)	9490	421 (4.44%)	90013	4250 (4.72%)	9021	379 (4.2%)	>0.99
Dis - Priimary	Colorectal Cancer	222218	2864 (1.29%)	2398	19 (0.79%)	46534	603 (1.3%)	9490	134 (1.41%)	90013	1227 (1.36%)	9021	130 (1.44%)	0.837
Dis - Priimary	Depressed Freq Last 2 Weeks	173325	9556 (5.51%)	1865	125 (6.7%)	36482	1996 (5.47%)	7403	404 (5.46%)	70195	3900 (5.56%)	6967	396 (5.68%)	>0.99
Dis - Priimary	Heart Failure	222218	4114 (1.85%)	2398	53 (2.21%)	46534	810 (1.74%)	9490	182 (1.92%)	90013	1698 (1.89%)	9021	154 (1.71%)	0.975
Dis - Priimary	Hypothyroidism	222218	13763 (6.19%)	2398	169 (7.05%)	46534	2876 (6.18%)	9490	565 (5.95%)	90013	5552 (6.17%)	9021	588 (6.52%)	>0.99
Dis - Priimary	Melanoma Cancer	222218	2605 (1.17%)	2398	35 (1.46%)	46534	519 (1.12%)	9490	124 (1.31%)	90013	1095 (1.22%)	9021	107 (1.19%)	0.787
Dis - Priimary	Osteoarthritis	222218	23438 (10.55%)	2398	269 (11.22%)	46534	5016 (10.78%)	9490	1007 (10.61%)	90013	9380 (10.42%)	9021	951 (10.54%)	>0.99
Dis - Priimary	Pneumonia	222218	9605 (4.32%)	2398	99 (4.13%)	46534	2024 (4.35%)	9490	377 (3.97%)	90013	3866 (4.29%)	9021	402 (4.46%)	>0.99
Dis - Priimary	Renal Failure	222218	3729 (1.68%)	2398	50 (2.09%)	46534	774 (1.66%)	9490	188 (1.98%)	90013	1481 (1.65%)	9021	130 (1.44%)	0.941
Dis - Priimary	Stoke	222222	4108 (1.85%)	2398	43 (1.79%)	46535	849 (1.82%)	9490	179 (1.89%)	90014	1771 (1.97%)	9021	189 (2.1%)	0.98
Dis - Priimary	Type II Diabetes	222218	12551 (5.65%)	2398	125 (5.21%)	46534	2577 (5.54%)	9490	522 (5.5%)	90013	4689 (5.21%)	9021	421 (4.67%)	>0.99
Dis - Priimary	Any Falls Last Year	221803	43258 (19.5%)	2394	485 (20.26%)	46457	9251 (19.91%)	9471	1862 (19.66%)	89826	17970 (20.01%)	9009	1822 (20.22%)	>0.99
Dis - Priimary	Breast Cancer	119958	7948 (6.63%)	1299	66 (5.08%)	24992	1618 (6.47%)	5084	349 (6.86%)	48532	3133 (6.46%)	4857	309 (6.36%)	>0.99
Dis - Priimary	COPD	222218	6916 (3.11%)	2398	84 (3.5%)	46534	1470 (3.16%)	9490	260 (2.74%)	90013	2706 (3.01%)	9021	207 (2.29%)	>0.99
Dis - Priimary	Coronary Artery Disease	222218	20377 (9.17%)	2398	221 (9.22%)	46534	3786 (8.14%)	9490	810 (8.54%)	90014	8857 (9.84%)	9021	920 (10.2%)	>0.99
Dis - Priimary	Fried Frailty	84938	3076 (3.62%)	870	35 (4.02%)	17784	638 (3.59%)	3579	113 (3.16%)	34035	1258 (3.7%)	3412	105 (3.08%)	0.88
Dis - Priimary	Hypertension	222219	72990 (32.85%)	2398	782 (32.61%)	46534	14808 (31.82%)	9490	2963 (31.22%)	90013	29498 (32.77%)	9021	2959 (32.8%)	>0.99
Dis - Priimary	Liver Disease	222222	3740 (1.68%)	2398	32 (1.33%)	46535	718 (1.54%)	9490	133 (1.4%)	90014	1412 (1.57%)	9021	120 (1.33%)	0.962
Dis - Priimary	Peripheral Artery Disease	222218	3082 (1.39%)	2398	47 (1.96%)	46534	638 (1.37%)	9490	109 (1.15%)	90013	1310 (1.46%)	9021	133 (1.47%)	0.868
Dis - Priimary	Prostate Cancer	102260	4315 (4.22%)	1099	43 (3.91%)	21542	922 (4.28%)	4406	168 (3.81%)	41481	1705 (4.11%)	4164	177 (4.25%)	>0.99
Dis - Priimary	Rheumatoid Arthritis	222218	4141 (1.86%)	2398	47 (1.96%)	46534	811 (1.74%)	9490	169 (1.78%)	90013	1656 (1.84%)	9021	151 (1.67%)	0.977
Dis - Secondary	AMD	222218	1865 (0.84%)	2398	17 (0.71%)	46534	384 (0.83%)	9490	67 (0.71%)	90013	705 (0.78%)	9021	57 (0.63%)	0.539
Dis - Secondary	Bladder Cancer	222218	1511 (0.68%)	2398	19 (0.79%)	46534	297 (0.64%)	9490	66 (0.7%)	90013	586 (0.65%)	9021	58 (0.64%)	0.381
Dis - Secondary	Delirium	222195	557 (0.25%)	2398	7 (0.29%)	46526	108 (0.23%)	9490	25 (0.26%)	90002	359 (0.4%)	9021	77 (0.85%)	0.052
Dis - Secondary	Dementia	222218	669 (0.3%)	2398	7 (0.29%)	46534	119 (0.26%)	9490	39 (0.41%)	90013	663 (0.74%)	9021	199 (2.21%)	0.082
Dis - Secondary	Lung Cancer	222218	1561 (0.7%)	2398	23 (0.96%)	46534	303 (0.65%)	9490	72 (0.76%)	90013	656 (0.73%)	9021	67 (0.74%)	0.397
Dis - Secondary	Parkinson's Disease	222218	904 (0.41%)	2398	9 (0.38%)	46534	188 (0.4%)	9490	43 (0.45%)	90013	374 (0.42%)	9021	36 (0.4%)	0.145
Dis - Secondary	Type I Diabetes	222218	1777 (0.8%)	2398	21 (0.88%)	46534	355 (0.76%)	9490	69 (0.73%)	90013	672 (0.75%)	9021	71 (0.79%)	0.487
Hematology	Basophill Count	215174	0.02 (0, 0.04)	2323	0.02 (0, 0.05)	45113	0.02 (0, 0.04)	9182	0.02 (0, 0.04)	87188	0.02 (0, 0.04)	8739	0.02 (0, 0.04)	> 0.99
Hematology	Basophill Percentage	215179	0.43 (0.3, 0.67)	2323	0.44 (0.3, 0.7)	45113	0.43 (0.3, 0.67)	9182	0.43 (0.3, 0.67)	87188	0.43 (0.3, 0.67)	8739	0.42 (0.3, 0.64)	>0.99
Hematology	Eosinophill Count	215174	0.14 (0.1, 0.21)	2323	0.13 (0.1, 0.2)	45113	0.13 (0.1, 0.2)	9182	0.13 (0.1, 0.2)	87188	0.14 (0.1, 0.21)	8739	0.13 (0.1, 0.2)	>0.99
Hematology	Eosinophill Percentage	215179	2.11 (1.38, 3.27)	2323	2 (1.3, 3.06)	45113	2.1 (1.34, 3.2)	9182	2.1 (1.32, 3.2)	87188	2.1 (1.37, 3.24)	8739	2.12 (1.35, 3.26)	>0.99
Hematology	Haematocrit Percentage	215569	41.1 (38.77, 43.53)	2327	41.19 (38.78, 43.5)	45177	41.1 (38.8, 43.6)	9195	41.04 (38.75, 43.58)	87351	41.07 (38.73, 43.49)	8749	41 (38.65, 43.45)	>0.99
Hematology	Haemoglobin Concentration	215569	14.19 (13.38, 15.06)	2327	14.16 (13.33, 15.01)	45177	14.2 (13.4, 15.09)	9195	14.16 (13.38, 15.09)	87351	14.19 (13.38, 15.04)	8749	14.18 (13.34, 15.05)	>0.99
Hematology	High Light Scatter Ret Count	211999	0.02 (0.01, 0.02)	2296	0.01 (0.01, 0.02)	44409	0.02 (0.01, 0.02)	9051	0.02 (0.01, 0.02)	85912	0.02 (0.01, 0.02)	8612	0.02 (0.01, 0.02)	> 0.99
Hematology	High Light Scatter Ret Perc	212000	0.36 (0.25, 0.5)	2296	0.31 (0.21, 0.43)	44409	0.35 (0.25, 0.49)	9051	0.35 (0.24, 0.49)	85912	0.36 (0.25, 0.5)	8612	0.35 (0.25, 0.49)	>0.99
Hematology	Immature Reticulocyte Frac	211999	0.29 (0.25, 0.33)	2296	0.27 (0.23, 0.31)	44409	0.29 (0.25, 0.33)	9051	0.29 (0.24, 0.33)	85912	0.29 (0.25, 0.33)	8612	0.29 (0.25, 0.33)	>0.99
Hematology	Lymphocyte Count	215174	1.86 (1.5, 2.28)	2323	1.82 (1.5, 2.25)	45113	1.87 (1.5, 2.29)	9182	1.86 (1.5, 2.27)	87188	1.85 (1.5, 2.27)	8739	1.84 (1.5, 2.24)	>0.99
Hematology	Lymphocyte Percentage	215179	28.35 (23.74, 33.2)	2323	27.85 (23.12, 32.6)	45113	28.4 (23.8, 33.3)	9182	28.45 (23.72, 33.2)	87188	28.37 (23.75, 33.2)	8739	28.4 (23.77, 33.22)	>0.99
Hematology	Mean Corp Hemoglobin	215567	31.57 (30.6, 32.56)	2327	31.35 (30.34, 32.33)	45177	31.53 (30.58, 32.54)	9195	31.56 (30.59, 32.5)	87350	31.59 (30.6, 32.58)	8749	31.6 (30.6, 32.6)	>0.99
Hematology	Mean Corp Hemoglobin Conc	215568	34.48 (33.9, 35.1)	2327	34.43 (33.8, 35.09)	45176	34.49 (33.9, 35.1)	9194	34.5 (33.9, 35.11)	87349	34.5 (33.9, 35.12)	8749	34.5 (33.92, 35.13)	> 0.99
Hematology	Mean Corpuscular Volume	215569	91.4 (88.8, 94.02)	2327	90.84 (88.1, 93.59)	45177	91.32 (88.74, 93.94)	9194	91.3 (88.74, 93.91)	87351	91.39 (88.8, 94)	8749	91.4 (88.73, 93.99)	>0.99
Hematology	Mean Platelet Volume	215568	9.2 (8.58, 9.93)	2327	9.3 (8.7, 10.04)	45177	9.2 (8.58, 9.93)	9195	9.2 (8.55, 9.92)	87347	9.2 (8.56, 9.92)	8749	9.17 (8.52, 9.9)	>0.99
Hematology	Mean Reticulocyte Volume	211999	105.87 (101.5, 110.5)	2296	106.5 (101.9, 111.07)	44409	106.08 (101.6, 110.7)	9051	105.93 (101.4, 110.63)	85912	105.7 (101.28, 110.33)	8612	105.4 (101, 110.03)	>0.99
Hematology	Mean Sphered Cell Volume	212000	82.72 (79.47, 86.13)	2296	83.34 (79.92, 86.98)	44409	82.9 (79.6, 86.4)	9051	82.8 (79.49, 86.3)	85912	82.55 (79.28, 85.99)	8612	82.46 (79.12, 85.77)	>0.99
Hematology	Monocyte Count	215174	0.46 (0.37, 0.57)	2323	0.47 (0.37, 0.59)	45113	0.46 (0.37, 0.57)	9182	0.45 (0.37, 0.57)	87188	0.45 (0.37, 0.57)	8739	0.45 (0.36, 0.56)	>0.99
Hematology	Monocyte Percentage	215179	6.9 (5.62, 8.3)	2323	6.86 (5.59, 8.39)	45113	6.89 (5.6, 8.3)	9182	6.83 (5.6, 8.25)	87188	6.86 (5.6, 8.28)	8739	6.84 (5.6, 8.2)	> 0.99
Hematology	Neutrophill Count	215174	4.04 (3.3, 4.99)	2323	4.1 (3.34, 5.1)	45113	4.04 (3.3, 5)	9182	4.03 (3.3, 4.99)	87188	4.04 (3.3, 4.97)	8739	4 (3.3, 4.92)	>0.99
Hematology	Neutrophill Percentage	215179	61.3 (55.9, 66.6)	2323	62 (56.5, 67.3)	45113	61.3 (55.9, 66.6)	9182	61.5 (56, 66.6)	87188	61.4 (55.9, 66.6)	8739	61.3 (55.9, 66.6)	>0.99
Hematology	Nucleated Red Blood Cell Count	215170	0 (0, 0)	2323	0 (0, 0)	45112	0 (0, 0)	9181	0 (0, 0)	87187	0 (0, 0)	8739	0 (0, 0)	>0.99
Hematology	Nucleated Red Blood Cell Perc	215168	0 (0, 0)	2323	0 (0, 0)	45112	0 (0, 0)	9181	0 (0, 0)	87186	0 (0, 0)	8739	0 (0, 0)	>0.99
Hematology	Platelet Count	215569	248 (213.6, 287.1)	2327	249 (214.8, 288)	45177	250 (215, 288.1)	9195	249 (215, 288)	87350	247 (212.6, 286.1)	8749	245 (212, 283)	>0.99
Hematology	Platelet Crit	215568	0.23 (0.2, 0.26)	2327	0.23 (0.2, 0.27)	45177	0.23 (0.2, 0.26)	9195	0.23 (0.2, 0.26)	87348	0.23 (0.2, 0.26)	8749	0.22 (0.2, 0.26)	> 0.99
Hematology	Platelet Distribution Width	215568	16.41 (16.11, 16.79)	2327	16.48 (16.14, 16.81)	45177	16.43 (16.13, 16.8)	9195	16.44 (16.13, 16.8)	87347	16.44 (16.13, 16.8)	8749	16.45 (16.14, 16.8)	>0.99
Hematology	Red Blood Cell Count	215569	4.5 (4.23, 4.78)	2327	4.53 (4.26, 4.82)	45177	4.51 (4.24, 4.79)	9195	4.5 (4.23, 4.79)	87351	4.5 (4.23, 4.78)	8749	4.49 (4.23, 4.78)	>0.99
Hematology	Red Blood Cell Dist Width	215569	13.32 (12.9, 13.83)	2327	13.68 (13.2, 14.27)	45177	13.4 (12.94, 13.9)	9194	13.34 (12.9, 13.83)	87351	13.3 (12.89, 13.8)	8749	13.27 (12.82, 13.79)	>0.99
Hematology	Reticulocyte Count	211999	0.06 (0.04, 0.07)	2296	0.05 (0.04, 0.07)	44409	0.06 (0.04, 0.07)	9051	0.06 (0.04, 0.07)	85912	0.06 (0.04, 0.07)	8612	0.06 (0.04, 0.07)	>0.99
Hematology	Reticulocyte Percentage	212000	1.26 (0.96, 1.62)	2296	1.13 (0.88, 1.47)	44408	1.24 (0.95, 1.59)	9051	1.23 (0.95, 1.6)	85912	1.26 (0.96, 1.62)	8612	1.25 (0.95, 1.61)	>0.99
Hematology	White Blood Cell Count	215565	6.66 (5.65, 7.86)	2327	6.74 (5.7, 8)	45177	6.68 (5.65, 7.88)	9195	6.65 (5.64, 7.82)	87351	6.64 (5.65, 7.82)	8749	6.6 (5.62, 7.78)	> 0.99
Mortality	Age at Death	8931	68.55 (63.38, 72.37)	100	68.44 (63.58, 71.61)	1807	68.67 (63.43, 72.4)	384	68.43 (63.11, 72.58)	3797	69.06 (64, 72.78)	420	68.91 (63.95, 73.09)	>0.99
Physical	49-Item Frailty	81073	5.75 (3.5, 8.5)	855	6 (3.75, 8.5)	17009	5.5 (3.5, 8.25)	3386	5.5 (3.5, 8)	32329	5.75 (3.5, 8.25)	3228	5.75 (3.75, 8.5)	>0.99
Physical	BMI	221457	26.71 (24.12, 29.86)	2392	26.95 (24.24, 30.23)	46402	26.79 (24.18, 29.96)	9459	26.6 (24.05, 29.79)	89726	26.64 (24.07, 29.76)	8997	26.43 (23.85, 29.42)	>0.99
Physical	Diastolic Blood Pressure	207628	82 (75, 89)	2235	82 (75, 89)	43516	82 (75, 89)	8916	82 (75, 89)	83957	82 (75, 89)	8393	81 (75, 89)	>0.99
Physical	FEV1	143254	2.78 (2.32, 3.36)	1587	2.79 (2.34, 3.41)	29953	2.79 (2.33, 3.37)	6116	2.8 (2.33, 3.4)	58192	2.79 (2.33, 3.37)	5889	2.81 (2.34, 3.4)	>0.99
Physical	FEV1/FVC Ratio	143254	0.77 (0.73, 0.8)	1587	0.77 (0.73, 0.8)	29953	0.77 (0.73, 0.8)	6116	0.77 (0.73, 0.8)	58192	0.77 (0.73, 0.8)	5889	0.77 (0.73, 0.8)	>0.99
Physical	FVC	143254	3.65 (3.06, 4.42)	1587	3.66 (3.08, 4.44)	29953	3.67 (3.08, 4.42)	6116	3.67 (3.08, 4.47)	58192	3.67 (3.07, 4.43)	5889	3.7 (3.1, 4.47)	>0.99
Physical	Heel Bone Mineral Density	126198	0.53 (0.45, 0.61)	1366	0.53 (0.46, 0.62)	26719	0.53 (0.45, 0.62)	5539	0.53 (0.45, 0.61)	51440	0.53 (0.45, 0.61)	5264	0.53 (0.45, 0.62)	>0.99
Physical	Maximal Grip Strength	221285	31 (24, 41)	2390	30 (24, 40)	46352	31 (24, 40)	9451	32 (24, 41)	89641	31 (24, 41)	8980	31 (24, 40)	>0.99
Physical	Reaction Time	220819	535 (480, 609)	2377	534 (479, 609)	46228	535 (480, 609)	9432	535 (477, 606)	89431	535 (480, 606)	8944	535 (480, 609)	>0.99
Physical	Systolic Blood Pressure	207622	138 (126, 152)	2234	138 (126, 152)	43516	138 (126, 152)	8916	138 (125, 151.25)	83955	138 (126, 152)	8392	138 (126, 152)	>0.99
Physical	Visual Memory Errors	222010	3 (2, 6)	2394	3 (2, 5)	46507	3 (2, 5)	9480	3 (2, 6)	89932	3 (2, 6)	9015	4 (2, 6)	>0.99
