# Supplementary material for: ApoE e2 and aging-related outcomes in 379,000 UK Biobank participants
Source: Aging (Albany NY). 2020 Jun 8;12(12):12222–33. doi: 10.18632/aging.103405 (PMC7343499; doi:10.18632/aging.103405)
Supplement: Supplementary Table 2 [file aging-12-103405-s002..xlsx]

## Sheet: Table S2 genotypic associations
Table S2 Associations Between the ApoE Genotypes and Aging Traits
e2e2 or e2e3 efffect test p-values significant at the Bonferron-corrected level of 5% (0.05/106) hilighted in red
Category	Trait	Model	Effect Measure	ApoE	Estimate	Lower	Upper	Unadjusted P
Biomarker	Alanine Aminotransferase	Linear	SD	e2e2	0.0393554	0.000543674	0.0781671	0.0468767
Biomarker	Alanine Aminotransferase	Linear	SD	e2e3	-0.000922701	-0.0105283	0.00868291	0.850664
Biomarker	Alanine Aminotransferase	Linear	SD	e2e4	-0.0498128	-0.0695695	-0.0300561	7.74844e-07
Biomarker	Alanine Aminotransferase	Linear	SD	e3e4	-0.0409636	-0.0484077	-0.0335196	4.07086e-27
Biomarker	Alanine Aminotransferase	Linear	SD	e4e4	-0.0710093	-0.0911903	-0.0508283	5.34332e-12
Biomarker	Alanine Aminotransferase	Linear		Overall				0.133661
Biomarker	Albumin	Linear	SD	e2e2	-0.0926627	-0.134628	-0.0506971	1.50706e-05
Biomarker	Albumin	Linear	SD	e2e3	-0.0210209	-0.0314668	-0.0105749	8.01048e-05
Biomarker	Albumin	Linear	SD	e2e4	-0.0137025	-0.0352042	0.00779917	0.211652
Biomarker	Albumin	Linear	SD	e3e4	-0.00998748	-0.0180912	-0.00188374	0.0157115
Biomarker	Albumin	Linear	SD	e4e4	-0.0111888	-0.0331913	0.0108136	0.318914
Biomarker	Albumin	Linear		Overall				7.30823e-08
Biomarker	Alkaline Phosphatase	Linear	SD	e2e2	0.127646	0.087314	0.167978	5.54389e-10
Biomarker	Alkaline Phosphatase	Linear	SD	e2e3	0.0191618	0.00916896	0.0291546	0.000171073
Biomarker	Alkaline Phosphatase	Linear	SD	e2e4	-0.0251878	-0.0457375	-0.00463815	0.0162912
Biomarker	Alkaline Phosphatase	Linear	SD	e3e4	-0.0319268	-0.0396706	-0.024183	6.45865e-16
Biomarker	Alkaline Phosphatase	Linear	SD	e4e4	-0.0621677	-0.0831572	-0.0411783	6.43712e-09
Biomarker	Alkaline Phosphatase	Linear		Overall				9.8583e-12
Biomarker	Apolipoprotein A	Linear	SD	e2e2	0.130686	0.0912434	0.170128	8.36796e-11
Biomarker	Apolipoprotein A	Linear	SD	e2e3	0.108392	0.0986122	0.118173	1.51201e-104
Biomarker	Apolipoprotein A	Linear	SD	e2e4	-0.00289377	-0.0230113	0.0172238	0.777999
Biomarker	Apolipoprotein A	Linear	SD	e3e4	-0.0998026	-0.107379	-0.0922259	7.91613e-147
Biomarker	Apolipoprotein A	Linear	SD	e4e4	-0.159383	-0.179969	-0.138798	5.39544e-52
Biomarker	Apolipoprotein A	Linear		Overall				8.10073e-110
Biomarker	Apolipoprotein B	Linear	SD	e2e2	-1.98565	-2.02771	-1.9436	0
Biomarker	Apolipoprotein B	Linear	SD	e2e3	-0.557282	-0.567131	-0.547432	0
Biomarker	Apolipoprotein B	Linear	SD	e2e4	-0.295333	-0.315589	-0.275078	2.04076e-179
Biomarker	Apolipoprotein B	Linear	SD	e3e4	0.206238	0.19861	0.213866	0
Biomarker	Apolipoprotein B	Linear	SD	e4e4	0.348121	0.327416	0.368826	8.61631e-238
Biomarker	Apolipoprotein B	Linear		Overall				0
Biomarker	Aspartate Aminotransferase	Linear	SD	e2e2	0.0702584	0.030635	0.109882	0.00051031
Biomarker	Aspartate Aminotransferase	Linear	SD	e2e3	0.00756827	-0.00224181	0.0173783	0.130517
Biomarker	Aspartate Aminotransferase	Linear	SD	e2e4	0.00138019	-0.0187986	0.021559	0.893357
Biomarker	Aspartate Aminotransferase	Linear	SD	e3e4	0.00345225	-0.00414951	0.011054	0.373415
Biomarker	Aspartate Aminotransferase	Linear	SD	e4e4	0.033142	0.0125259	0.053758	0.00162836
Biomarker	Aspartate Aminotransferase	Linear		Overall				0.000940819
Biomarker	Calcium	Linear	SD	e2e2	-0.0279626	-0.0704244	0.0144992	0.196806
Biomarker	Calcium	Linear	SD	e2e3	-0.00512068	-0.0156955	0.0054541	0.342579
Biomarker	Calcium	Linear	SD	e2e4	0.00714167	-0.0146207	0.028904	0.520098
Biomarker	Calcium	Linear	SD	e3e4	-0.0158451	-0.0240485	-0.00764178	0.000153269
Biomarker	Calcium	Linear	SD	e4e4	-0.0205652	-0.0428399	0.00170949	0.0703673
Biomarker	Calcium	Linear		Overall				0.291574
Biomarker	Cholesterol	Linear	SD	e2e2	-0.776521	-0.816624	-0.736418	1.56E-314
Biomarker	Cholesterol	Linear	SD	e2e3	-0.332543	-0.34247	-0.322616	0
Biomarker	Cholesterol	Linear	SD	e2e4	-0.171474	-0.191889	-0.15106	7.10256e-61
Biomarker	Cholesterol	Linear	SD	e3e4	0.133855	0.126161	0.141548	1.86246e-254
Biomarker	Cholesterol	Linear	SD	e4e4	0.224964	0.204112	0.245816	3.52448e-99
Biomarker	Cholesterol	Linear		Overall				0
Biomarker	C-Reactive Protein	Linear	SD	e2e2	0.050384	0.00992743	0.0908406	0.0146508
Biomarker	C-Reactive Protein	Linear	SD	e2e3	0.0499436	0.0399321	0.0599552	1.41596e-22
Biomarker	C-Reactive Protein	Linear	SD	e2e4	-0.151696	-0.172287	-0.131105	3.01438e-47
Biomarker	C-Reactive Protein	Linear	SD	e3e4	-0.260514	-0.268273	-0.252755	0
Biomarker	C-Reactive Protein	Linear	SD	e4e4	-0.55443	-0.575477	-0.533384	0
Biomarker	C-Reactive Protein	Linear		Overall				2.27014e-22
Biomarker	Creatinine	Linear	SD	e2e2	-0.0149481	-0.0481053	0.0182092	0.376913
Biomarker	Creatinine	Linear	SD	e2e3	0.019303	0.0110861	0.02752	4.14022e-06
Biomarker	Creatinine	Linear	SD	e2e4	-0.0193	-0.0361996	-0.00240051	0.0251976
Biomarker	Creatinine	Linear	SD	e3e4	-0.0253477	-0.0317159	-0.0189795	6.1411e-15
Biomarker	Creatinine	Linear	SD	e4e4	-0.062834	-0.0800945	-0.0455735	9.70185e-13
Biomarker	Creatinine	Linear		Overall				1.38702e-05
Biomarker	Cystatin C	Linear	SD	e2e2	0.0893876	0.0520927	0.126682	2.63326e-06
Biomarker	Cystatin C	Linear	SD	e2e3	0.0216468	0.0124088	0.0308849	4.37828e-06
Biomarker	Cystatin C	Linear	SD	e2e4	-0.0124912	-0.0314913	0.00650885	0.197559
Biomarker	Cystatin C	Linear	SD	e3e4	-0.0307937	-0.0379535	-0.0236339	3.48049e-17
Biomarker	Cystatin C	Linear	SD	e4e4	-0.0497798	-0.0691823	-0.0303773	4.94405e-07
Biomarker	Cystatin C	Linear		Overall				1.03588e-09
Biomarker	Direct Bilirubin	Linear	SD	e2e2	0.218489	0.176125	0.260854	5.12041e-24
Biomarker	Direct Bilirubin	Linear	SD	e2e3	0.0595042	0.0489183	0.0700902	3.20149e-28
Biomarker	Direct Bilirubin	Linear	SD	e2e4	0.0265133	0.00452823	0.0484983	0.0180963
Biomarker	Direct Bilirubin	Linear	SD	e3e4	-0.0246022	-0.0328864	-0.0163181	5.86667e-09
Biomarker	Direct Bilirubin	Linear	SD	e4e4	-0.0206868	-0.0432791	0.00190556	0.0727105
Biomarker	Direct Bilirubin	Linear		Overall				3.24904e-47
Biomarker	Gamma Glutamyltransferase	Linear	SD	e2e2	0.0269224	-0.0112768	0.0651216	0.167168
Biomarker	Gamma Glutamyltransferase	Linear	SD	e2e3	-0.0125216	-0.021989	-0.00305413	0.00953583
Biomarker	Gamma Glutamyltransferase	Linear	SD	e2e4	-0.0275311	-0.0469994	-0.00806284	0.00557692
Biomarker	Gamma Glutamyltransferase	Linear	SD	e3e4	-0.0179449	-0.0252811	-0.0106087	1.63379e-06
Biomarker	Gamma Glutamyltransferase	Linear	SD	e4e4	-0.0365819	-0.056466	-0.0166979	0.000311159
Biomarker	Gamma Glutamyltransferase	Linear		Overall				0.0113741
Biomarker	Glucose	Linear	SD	e2e2	-0.0398564	-0.0818636	0.00215081	0.0629414
Biomarker	Glucose	Linear	SD	e2e3	-0.005151	-0.0156103	0.00530828	0.334423
Biomarker	Glucose	Linear	SD	e2e4	-0.00990117	-0.0314294	0.0116271	0.367367
Biomarker	Glucose	Linear	SD	e3e4	-0.00315198	-0.0112671	0.00496309	0.446495
Biomarker	Glucose	Linear	SD	e4e4	-0.0161183	-0.0381498	0.0059133	0.1516
Biomarker	Glucose	Linear		Overall				0.119918
Biomarker	HbA1c	Linear	SD	e2e2	-0.00875187	-0.0480196	0.0305159	0.662234
Biomarker	HbA1c	Linear	SD	e2e3	-0.0133849	-0.0231441	-0.00362571	0.00718578
Biomarker	HbA1c	Linear	SD	e2e4	-0.0147599	-0.0348037	0.00528396	0.148943
Biomarker	HbA1c	Linear	SD	e3e4	-0.0255036	-0.03307	-0.0179371	3.94666e-11
Biomarker	HbA1c	Linear	SD	e4e4	-0.0456943	-0.066264	-0.0251247	1.3374e-05
Biomarker	HbA1c	Linear		Overall				0.0256173
Biomarker	HDL Cholesterol	Linear	SD	e2e2	0.0262902	-0.0123416	0.064922	0.182264
Biomarker	HDL Cholesterol	Linear	SD	e2e3	0.0653286	0.0557131	0.074944	1.90851e-40
Biomarker	HDL Cholesterol	Linear	SD	e2e4	-0.0243769	-0.0441694	-0.00458451	0.0157812
Biomarker	HDL Cholesterol	Linear	SD	e3e4	-0.0737716	-0.0812319	-0.0663113	1.23996e-83
Biomarker	HDL Cholesterol	Linear	SD	e4e4	-0.116174	-0.13643	-0.0959175	2.60032e-29
Biomarker	HDL Cholesterol	Linear		Overall				2.40589e-39
Biomarker	IGF-1	Linear	SD	e2e2	-0.0451504	-0.0849808	-0.00532	0.0263009
Biomarker	IGF-1	Linear	SD	e2e3	-0.00550935	-0.0153769	0.00435821	0.273822
Biomarker	IGF-1	Linear	SD	e2e4	0.0168073	-0.0035011	0.0371157	0.104789
Biomarker	IGF-1	Linear	SD	e3e4	0.0187025	0.0110565	0.0263484	1.63398e-06
Biomarker	IGF-1	Linear	SD	e4e4	0.0299496	0.00921831	0.050681	0.00463367
Biomarker	IGF-1	Linear		Overall				0.0514252
Biomarker	LDL Direct	Linear	SD	e2e2	-1.12135	-1.16169	-1.08101	0
Biomarker	LDL Direct	Linear	SD	e2e3	-0.43196	-0.441947	-0.421974	0
Biomarker	LDL Direct	Linear	SD	e2e4	-0.240343	-0.260885	-0.2198	2.76852e-116
Biomarker	LDL Direct	Linear	SD	e3e4	0.153761	0.146022	0.1615	0
Biomarker	LDL Direct	Linear	SD	e4e4	0.245628	0.224655	0.266601	1.6126e-116
Biomarker	LDL Direct	Linear		Overall				0
Biomarker	Lipoprotein A	Linear	SD	e2e2	-0.40074	-0.447973	-0.353507	4.58407e-62
Biomarker	Lipoprotein A	Linear	SD	e2e3	-0.0973277	-0.108846	-0.0858095	1.41126e-61
Biomarker	Lipoprotein A	Linear	SD	e2e4	-0.12005	-0.143794	-0.0963058	3.8177e-23
Biomarker	Lipoprotein A	Linear	SD	e3e4	-0.021025	-0.0298878	-0.0121621	3.32833e-06
Biomarker	Lipoprotein A	Linear	SD	e4e4	-0.0651053	-0.0892708	-0.0409398	1.28982e-07
Biomarker	Lipoprotein A	Linear		Overall				1.93152e-115
Biomarker	Oestradiol	Linear	SD	e2e2	0.0353267	-0.0487879	0.119441	0.410425
Biomarker	Oestradiol	Linear	SD	e2e3	-0.025637	-0.0472276	-0.00404629	0.0199538
Biomarker	Oestradiol	Linear	SD	e2e4	0.0132178	-0.0304363	0.0568719	0.552885
Biomarker	Oestradiol	Linear	SD	e3e4	-0.00449138	-0.0210697	0.0120869	0.595426
Biomarker	Oestradiol	Linear	SD	e4e4	-0.0347989	-0.0797514	0.0101536	0.129207
Biomarker	Oestradiol	Linear		Overall				0.0434207
Biomarker	Phosphate	Linear	SD	e2e2	-0.0163962	-0.0575545	0.024762	0.434925
Biomarker	Phosphate	Linear	SD	e2e3	-0.00561692	-0.0158571	0.00462327	0.282342
Biomarker	Phosphate	Linear	SD	e2e4	0.0171161	-0.00395254	0.0381847	0.111325
Biomarker	Phosphate	Linear	SD	e3e4	-0.00413998	-0.0120827	0.00380279	0.306978
Biomarker	Phosphate	Linear	SD	e4e4	-0.0290989	-0.0506538	-0.00754413	0.00814666
Biomarker	Phosphate	Linear		Overall				0.428313
Biomarker	Rheumatoid Factor	Linear	SD	e2e2	-0.0842156	-0.224532	0.0561005	0.239468
Biomarker	Rheumatoid Factor	Linear	SD	e2e3	-0.0345777	-0.0683627	-0.000792672	0.04487
Biomarker	Rheumatoid Factor	Linear	SD	e2e4	0.0225326	-0.0500055	0.0950706	0.542645
Biomarker	Rheumatoid Factor	Linear	SD	e3e4	0.00430992	-0.022295	0.0309148	0.75086
Biomarker	Rheumatoid Factor	Linear	SD	e4e4	0.0113381	-0.063662	0.0863382	0.767006
Biomarker	Rheumatoid Factor	Linear		Overall				0.0738015
Biomarker	Sex Hormone Binding Globulin	Linear	SD	e2e2	0.0464456	0.00731516	0.0855761	0.0199997
Biomarker	Sex Hormone Binding Globulin	Linear	SD	e2e3	0.0160561	0.00630965	0.0258026	0.00124322
Biomarker	Sex Hormone Binding Globulin	Linear	SD	e2e4	0.038842	0.0187735	0.0589105	0.00014859
Biomarker	Sex Hormone Binding Globulin	Linear	SD	e3e4	0.0195497	0.0119863	0.0271131	4.06299e-07
Biomarker	Sex Hormone Binding Globulin	Linear	SD	e4e4	0.0639543	0.0434158	0.0844927	1.04145e-09
Biomarker	Sex Hormone Binding Globulin	Linear		Overall				0.000497273
Biomarker	Testosterone	Linear	SD	e2e2	0.0211666	-0.00498701	0.0473202	0.112687
Biomarker	Testosterone	Linear	SD	e2e3	0.00775252	0.00127418	0.0142309	0.0190044
Biomarker	Testosterone	Linear	SD	e2e4	-0.00371545	-0.0170272	0.00959629	0.584347
Biomarker	Testosterone	Linear	SD	e3e4	-0.000689616	-0.00571459	0.00433535	0.787944
Biomarker	Testosterone	Linear	SD	e4e4	0.00150136	-0.0121169	0.0151196	0.828927
Biomarker	Testosterone	Linear		Overall				0.0211625
Biomarker	Total Bilirubin	Linear	SD	e2e2	-0.0303088	-0.0696465	0.00902886	0.131016
Biomarker	Total Bilirubin	Linear	SD	e2e3	-0.0153371	-0.0250869	-0.00558722	0.00204847
Biomarker	Total Bilirubin	Linear	SD	e2e4	-0.0161421	-0.036193	0.00390883	0.114594
Biomarker	Total Bilirubin	Linear	SD	e3e4	0.0158124	0.00825693	0.0233678	4.09853e-05
Biomarker	Total Bilirubin	Linear	SD	e4e4	0.0466429	0.0261563	0.0671294	8.10873e-06
Biomarker	Total Bilirubin	Linear		Overall				0.00333594
Biomarker	Total Protein	Linear	SD	e2e2	-0.0312894	-0.0739352	0.0113564	0.150425
Biomarker	Total Protein	Linear	SD	e2e3	-0.0206331	-0.0312423	-0.0100238	0.000138001
Biomarker	Total Protein	Linear	SD	e2e4	-0.00976321	-0.0315956	0.0120692	0.380773
Biomarker	Total Protein	Linear	SD	e3e4	-0.00679145	-0.0150213	0.00143843	0.105793
Biomarker	Total Protein	Linear	SD	e4e4	-0.0241618	-0.0465059	-0.00181779	0.034056
Biomarker	Total Protein	Linear		Overall				0.00031093
Biomarker	Triglycerides	Linear	SD	e2e2	0.414618	0.374681	0.454554	5.42396e-92
Biomarker	Triglycerides	Linear	SD	e2e3	0.105963	0.0960659	0.11586	1.04089e-97
Biomarker	Triglycerides	Linear	SD	e2e4	0.170103	0.149752	0.190453	2.67335e-60
Biomarker	Triglycerides	Linear	SD	e3e4	0.0744408	0.0667712	0.0821103	1.1937e-80
Biomarker	Triglycerides	Linear	SD	e4e4	0.133628	0.112839	0.154416	2.19023e-36
Biomarker	Triglycerides	Linear		Overall				2.13054e-178
Biomarker	Urate	Linear	SD	e2e2	-0.0115525	-0.0465213	0.0234163	0.517304
Biomarker	Urate	Linear	SD	e2e3	0.00451356	-0.00414648	0.0131736	0.307008
Biomarker	Urate	Linear	SD	e2e4	-0.0249796	-0.0427908	-0.00716837	0.00598207
Biomarker	Urate	Linear	SD	e3e4	-0.0144311	-0.021142	-0.00772025	2.50146e-05
Biomarker	Urate	Linear	SD	e4e4	-0.0537976	-0.0719855	-0.0356096	6.74387e-09
Biomarker	Urate	Linear		Overall				0.467074
Biomarker	Urea	Linear	SD	e2e2	-0.0167222	-0.0561319	0.0226875	0.405609
Biomarker	Urea	Linear	SD	e2e3	0.000611279	-0.00915746	0.01038	0.902388
Biomarker	Urea	Linear	SD	e2e4	-0.0310074	-0.0510937	-0.0109211	0.00248145
Biomarker	Urea	Linear	SD	e3e4	-0.0194517	-0.0270209	-0.0118824	4.73681e-07
Biomarker	Urea	Linear	SD	e4e4	-0.0553221	-0.0758363	-0.0348079	1.25381e-07
Biomarker	Urea	Linear		Overall				0.698796
Biomarker	Vitamin D	Linear	SD	e2e2	0.100939	0.0598008	0.142077	1.51692e-06
Biomarker	Vitamin D	Linear	SD	e2e3	0.0243323	0.0141775	0.0344871	2.6494e-06
Biomarker	Vitamin D	Linear	SD	e2e4	0.0131752	-0.00776903	0.0341194	0.2176
Biomarker	Vitamin D	Linear	SD	e3e4	-0.0121569	-0.020151	-0.00416281	0.00287716
Biomarker	Vitamin D	Linear	SD	e4e4	-0.0414819	-0.0633309	-0.0196329	0.000198363
Biomarker	Vitamin D	Linear		Overall				3.98008e-10
Chronic Pain	Back Pain for 3+ Months	Logistic	OR	e2e2	1.09542	0.987926	1.21461	0.0837297
Chronic Pain	Back Pain for 3+ Months	Logistic	OR	e2e3	1.01272	0.986412	1.03973	0.346604
Chronic Pain	Back Pain for 3+ Months	Logistic	OR	e2e4	0.979167	0.927056	1.03421	0.450534
Chronic Pain	Back Pain for 3+ Months	Logistic	OR	e3e4	0.955457	0.935895	0.975427	1.57987e-05
Chronic Pain	Back Pain for 3+ Months	Logistic	OR	e4e4	0.950164	0.897916	1.00545	0.0764743
Chronic Pain	Back Pain for 3+ Months	Logistic		Overall				0.158287
Chronic Pain	Hip Pain for 3+ Months	Logistic	OR	e2e2	1.07069	0.930475	1.23204	0.340201
Chronic Pain	Hip Pain for 3+ Months	Logistic	OR	e2e3	1.02416	0.988496	1.06111	0.186795
Chronic Pain	Hip Pain for 3+ Months	Logistic	OR	e2e4	0.979954	0.909895	1.05541	0.592603
Chronic Pain	Hip Pain for 3+ Months	Logistic	OR	e3e4	0.983467	0.956475	1.01122	0.240358
Chronic Pain	Hip Pain for 3+ Months	Logistic	OR	e4e4	1.00412	0.931301	1.08263	0.914809
Chronic Pain	Hip Pain for 3+ Months	Logistic		Overall				0.282873
Chronic Pain	Knee Pain for 3+ Months	Logistic	OR	e2e2	1.07593	0.96733	1.19673	0.177617
Chronic Pain	Knee Pain for 3+ Months	Logistic	OR	e2e3	1.01424	0.987303	1.04191	0.303215
Chronic Pain	Knee Pain for 3+ Months	Logistic	OR	e2e4	0.987965	0.934354	1.04465	0.670568
Chronic Pain	Knee Pain for 3+ Months	Logistic	OR	e3e4	0.983338	0.962873	1.00424	0.11737
Chronic Pain	Knee Pain for 3+ Months	Logistic	OR	e4e4	0.958488	0.90472	1.01545	0.150039
Chronic Pain	Knee Pain for 3+ Months	Logistic		Overall				0.254975
Cognitive Function	Reaction Time	Linear	SD	e2e2	0.00086354	-0.0371499	0.0388769	0.964487
Cognitive Function	Reaction Time	Linear	SD	e2e3	-0.000428748	-0.00985851	0.00900102	0.928991
Cognitive Function	Reaction Time	Linear	SD	e2e4	0.000201077	-0.0191818	0.0195839	0.983778
Cognitive Function	Reaction Time	Linear	SD	e3e4	0.00224559	-0.00506245	0.00955363	0.547008
Cognitive Function	Reaction Time	Linear	SD	e4e4	0.0155196	-0.00436439	0.0354036	0.126075
Cognitive Function	Reaction Time	Linear		Overall				0.994871
Cognitive Function	Visual Memory Errors	Linear	SD	e2e2	0.00679335	-0.0330337	0.0466204	0.738144
Cognitive Function	Visual Memory Errors	Linear	SD	e2e3	-0.00767066	-0.0175561	0.00221482	0.128301
Cognitive Function	Visual Memory Errors	Linear	SD	e2e4	0.0245567	0.00422852	0.0448849	0.0179014
Cognitive Function	Visual Memory Errors	Linear	SD	e3e4	0.00650557	-0.00115718	0.0141683	0.0961167
Cognitive Function	Visual Memory Errors	Linear	SD	e4e4	0.0268002	0.00597483	0.0476255	0.0116601
Cognitive Function	Visual Memory Errors	Linear		Overall				0.290372
Disease - Primary	49-Item Frailty Index	Linear	SD	e2e2	0.0580891	-0.00860527	0.124783	0.0878097
Disease - Primary	49-Item Frailty Index	Linear	SD	e2e3	-0.0277235	-0.044086	-0.011361	0.000897721
Disease - Primary	49-Item Frailty Index	Linear	SD	e2e4	-0.0443956	-0.0784268	-0.0103644	0.0105627
Disease - Primary	49-Item Frailty Index	Linear	SD	e3e4	0.00288507	-0.00987808	0.0156482	0.657735
Disease - Primary	49-Item Frailty Index	Linear	SD	e4e4	0.0346986	-0.00012331	0.0695205	0.0508188
Disease - Primary	49-Item Frailty Index	Linear		Overall				0.000727701
Disease - Primary	Anemia	Logistic	OR	e2e2	1.05112	0.828444	1.33366	0.681449
Disease - Primary	Anemia	Logistic	OR	e2e3	0.964489	0.907451	1.02511	0.24503
Disease - Primary	Anemia	Logistic	OR	e2e4	0.982145	0.866803	1.11283	0.777438
Disease - Primary	Anemia	Logistic	OR	e3e4	1.03785	0.991218	1.08668	0.113206
Disease - Primary	Anemia	Logistic	OR	e4e4	0.862247	0.752986	0.987363	0.0320394
Disease - Primary	Anemia	Logistic		Overall				0.455862
Disease - Primary	Atrial Fibrillation	Logistic	OR	e2e2	1.26031	1.05176	1.51021	0.0121853
Disease - Primary	Atrial Fibrillation	Logistic	OR	e2e3	0.957883	0.911651	1.00646	0.0882259
Disease - Primary	Atrial Fibrillation	Logistic	OR	e2e4	0.98097	0.886286	1.08577	0.710631
Disease - Primary	Atrial Fibrillation	Logistic	OR	e3e4	1.05317	1.01453	1.09329	0.0066056
Disease - Primary	Atrial Fibrillation	Logistic	OR	e4e4	0.926854	0.833184	1.03105	0.162302
Disease - Primary	Atrial Fibrillation	Logistic		Overall				0.00994104
Disease - Primary	Breast Cancer	Logistic	OR	e2e2	0.757701	0.590449	0.972329	0.0292214
Disease - Primary	Breast Cancer	Logistic	OR	e2e3	0.977867	0.925081	1.03367	0.429244
Disease - Primary	Breast Cancer	Logistic	OR	e2e4	1.0473	0.936799	1.17083	0.416589
Disease - Primary	Breast Cancer	Logistic	OR	e3e4	0.978206	0.937105	1.02111	0.314337
Disease - Primary	Breast Cancer	Logistic	OR	e4e4	0.97503	0.866609	1.09702	0.674169
Disease - Primary	Breast Cancer	Logistic		Overall				0.059441
Disease - Primary	Coronary Artery Disease	Logistic	OR	e2e2	1.03531	0.896971	1.19498	0.635373
Disease - Primary	Coronary Artery Disease	Logistic	OR	e2e3	0.866552	0.834857	0.89945	4.91877e-14
Disease - Primary	Coronary Artery Disease	Logistic	OR	e2e4	0.928562	0.860928	1.00151	0.0547516
Disease - Primary	Coronary Artery Disease	Logistic	OR	e3e4	1.09325	1.06401	1.12328	1.1399e-10
Disease - Primary	Coronary Artery Disease	Logistic	OR	e4e4	1.14258	1.0631	1.22799	0.000290542
Disease - Primary	Coronary Artery Disease	Logistic		Overall				1.71709e-13
Disease - Primary	Colorectal Cancer	Logistic	OR	e2e2	0.629749	0.400155	0.991076	0.0456402
Disease - Primary	Colorectal Cancer	Logistic	OR	e2e3	1.00493	0.919734	1.09801	0.913383
Disease - Primary	Colorectal Cancer	Logistic	OR	e2e4	1.10978	0.931729	1.32186	0.243035
Disease - Primary	Colorectal Cancer	Logistic	OR	e3e4	1.06463	0.995158	1.13896	0.0689112
Disease - Primary	Colorectal Cancer	Logistic	OR	e4e4	1.12893	0.945351	1.34815	0.180474
Disease - Primary	Colorectal Cancer	Logistic		Overall				0.0955788
Disease - Primary	COPD	Logistic	OR	e2e2	1.14663	0.918098	1.43206	0.227624
Disease - Primary	COPD	Logistic	OR	e2e3	1.01734	0.960052	1.07804	0.561036
Disease - Primary	COPD	Logistic	OR	e2e4	0.896683	0.78975	1.01809	0.0923391
Disease - Primary	COPD	Logistic	OR	e3e4	0.972668	0.929211	1.01816	0.23471
Disease - Primary	COPD	Logistic	OR	e4e4	0.750652	0.651793	0.864505	6.86978e-05
Disease - Primary	COPD	Logistic		Overall				0.431745
Disease - Primary	Heart Failure	Logistic	OR	e2e2	1.24395	0.943719	1.63968	0.121399
Disease - Primary	Heart Failure	Logistic	OR	e2e3	0.935492	0.86658	1.00988	0.0876318
Disease - Primary	Heart Failure	Logistic	OR	e2e4	1.04752	0.900709	1.21826	0.546782
Disease - Primary	Heart Failure	Logistic	OR	e3e4	1.0252	0.96793	1.08585	0.396139
Disease - Primary	Heart Failure	Logistic	OR	e4e4	0.927879	0.788074	1.09249	0.368992
Disease - Primary	Heart Failure	Logistic		Overall				0.0658086
Disease - Primary	Hypertension	Logistic	OR	e2e2	1.00512	0.9188	1.09956	0.911191
Disease - Primary	Hypertension	Logistic	OR	e2e3	0.944962	0.924033	0.966366	7.27776e-07
Disease - Primary	Hypertension	Logistic	OR	e2e4	0.929422	0.887351	0.973487	0.00195556
Disease - Primary	Hypertension	Logistic	OR	e3e4	1.00303	0.985865	1.02049	0.73143
Disease - Primary	Hypertension	Logistic	OR	e4e4	1.00882	0.962579	1.05729	0.713662
Disease - Primary	Hypertension	Logistic		Overall				4.25401e-06
Disease - Primary	Hypothyroidism	Logistic	OR	e2e2	1.15575	0.984734	1.35648	0.0764475
Disease - Primary	Hypothyroidism	Logistic	OR	e2e3	1.00307	0.961684	1.04623	0.886683
Disease - Primary	Hypothyroidism	Logistic	OR	e2e4	0.969188	0.887494	1.0584	0.486057
Disease - Primary	Hypothyroidism	Logistic	OR	e3e4	1.0002	0.968051	1.03342	0.990344
Disease - Primary	Hypothyroidism	Logistic	OR	e4e4	1.07291	0.983773	1.17013	0.111772
Disease - Primary	Hypothyroidism	Logistic		Overall				0.220086
Disease - Primary	Liver Disease	Logistic	OR	e2e2	0.802603	0.565259	1.1396	0.218935
Disease - Primary	Liver Disease	Logistic	OR	e2e3	0.918098	0.847028	0.995131	0.0376461
Disease - Primary	Liver Disease	Logistic	OR	e2e4	0.836013	0.702272	0.995224	0.0440312
Disease - Primary	Liver Disease	Logistic	OR	e3e4	0.932719	0.87684	0.992159	0.0271248
Disease - Primary	Liver Disease	Logistic	OR	e4e4	0.795385	0.662276	0.955247	0.0142879
Disease - Primary	Liver Disease	Logistic		Overall				0.0546019
Disease - Primary	Melanoma Cancer	Logistic	OR	e2e2	1.25907	0.899531	1.7623	0.179339
Disease - Primary	Melanoma Cancer	Logistic	OR	e2e3	0.948497	0.862693	1.04283	0.274397
Disease - Primary	Melanoma Cancer	Logistic	OR	e2e4	1.11711	0.931712	1.3394	0.231674
Disease - Primary	Melanoma Cancer	Logistic	OR	e3e4	1.04118	0.969741	1.11788	0.265843
Disease - Primary	Melanoma Cancer	Logistic	OR	e4e4	1.01553	0.835924	1.23372	0.876674
Disease - Primary	Melanoma Cancer	Logistic		Overall				0.220936
Disease - Primary	Osteoarthritis	Logistic	OR	e2e2	1.09912	0.964358	1.25272	0.156731
Disease - Primary	Osteoarthritis	Logistic	OR	e2e3	1.02501	0.991724	1.05941	0.142493
Disease - Primary	Osteoarthritis	Logistic	OR	e2e4	1.01551	0.948511	1.08724	0.658522
Disease - Primary	Osteoarthritis	Logistic	OR	e3e4	0.988734	0.963472	1.01466	0.390883
Disease - Primary	Osteoarthritis	Logistic	OR	e4e4	1.00931	0.941004	1.08258	0.795427
Disease - Primary	Osteoarthritis	Logistic		Overall				0.139845
Disease - Primary	Osteoporosis	Logistic	OR	e2e2	1.17039	0.936089	1.46334	0.167438
Disease - Primary	Osteoporosis	Logistic	OR	e2e3	1.0112	0.953385	1.07252	0.710836
Disease - Primary	Osteoporosis	Logistic	OR	e2e4	1.07365	0.953223	1.20929	0.241713
Disease - Primary	Osteoporosis	Logistic	OR	e3e4	1.01222	0.96709	1.05945	0.60178
Disease - Primary	Osteoporosis	Logistic	OR	e4e4	1.11735	0.990564	1.26035	0.0709702
Disease - Primary	Osteoporosis	Logistic		Overall				0.38267
Disease - Primary	Peripheral Vascular Disease	Logistic	OR	e2e2	1.45231	1.08441	1.94501	0.0122901
Disease - Primary	Peripheral Vascular Disease	Logistic	OR	e2e3	0.989516	0.907888	1.07848	0.810385
Disease - Primary	Peripheral Vascular Disease	Logistic	OR	e2e4	0.836492	0.689945	1.01417	0.0692455
Disease - Primary	Peripheral Vascular Disease	Logistic	OR	e3e4	1.05375	0.987126	1.12488	0.116153
Disease - Primary	Peripheral Vascular Disease	Logistic	OR	e4e4	1.07573	0.902659	1.28198	0.414693
Disease - Primary	Peripheral Vascular Disease	Logistic		Overall				0.0570542
Disease - Primary	Pneumonia	Logistic	OR	e2e2	0.96039	0.783945	1.17655	0.696383
Disease - Primary	Pneumonia	Logistic	OR	e2e3	1.00243	0.954286	1.05299	0.923124
Disease - Primary	Pneumonia	Logistic	OR	e2e4	0.920241	0.828175	1.02254	0.122232
Disease - Primary	Pneumonia	Logistic	OR	e3e4	0.996673	0.959205	1.03561	0.864668
Disease - Primary	Pneumonia	Logistic	OR	e4e4	1.03993	0.938614	1.15218	0.454069
Disease - Primary	Pneumonia	Logistic		Overall				0.919914
Disease - Primary	Prostate Cancer	Logistic	OR	e2e2	0.958687	0.702821	1.3077	0.789966
Disease - Primary	Prostate Cancer	Logistic	OR	e2e3	1.00024	0.92919	1.07672	0.994935
Disease - Primary	Prostate Cancer	Logistic	OR	e2e4	0.903697	0.770689	1.05966	0.212547
Disease - Primary	Prostate Cancer	Logistic	OR	e3e4	0.985851	0.930253	1.04477	0.630411
Disease - Primary	Prostate Cancer	Logistic	OR	e4e4	1.00127	0.856878	1.16998	0.987294
Disease - Primary	Prostate Cancer	Logistic		Overall				0.964582
Disease - Primary	Renal Failure	Logistic	OR	e2e2	1.26829	0.954801	1.68472	0.100864
Disease - Primary	Renal Failure	Logistic	OR	e2e3	0.984538	0.910215	1.06493	0.6972
Disease - Primary	Renal Failure	Logistic	OR	e2e4	1.19366	1.02848	1.38536	0.0198303
Disease - Primary	Renal Failure	Logistic	OR	e3e4	0.988638	0.930099	1.05086	0.713681
Disease - Primary	Renal Failure	Logistic	OR	e4e4	0.865551	0.725146	1.03314	0.109839
Disease - Primary	Renal Failure	Logistic		Overall				0.256742
Disease - Primary	Rheumatoid Arthritis	Logistic	OR	e2e2	1.05889	0.791354	1.41687	0.700176
Disease - Primary	Rheumatoid Arthritis	Logistic	OR	e2e3	0.934863	0.866333	1.00881	0.0829092
Disease - Primary	Rheumatoid Arthritis	Logistic	OR	e2e4	0.962683	0.82396	1.12476	0.631908
Disease - Primary	Rheumatoid Arthritis	Logistic	OR	e3e4	0.98997	0.934486	1.04875	0.731936
Disease - Primary	Rheumatoid Arthritis	Logistic	OR	e4e4	0.906111	0.768942	1.06775	0.239105
Disease - Primary	Rheumatoid Arthritis	Logistic		Overall				0.195973
Disease - Primary	Stroke	Logistic	OR	e2e2	0.996652	0.735024	1.35141	0.98278
Disease - Primary	Stroke	Logistic	OR	e2e3	0.984059	0.913034	1.06061	0.674162
Disease - Primary	Stroke	Logistic	OR	e2e4	1.029	0.884084	1.19767	0.712039
Disease - Primary	Stroke	Logistic	OR	e3e4	1.07015	1.01133	1.13239	0.0187504
Disease - Primary	Stroke	Logistic	OR	e4e4	1.14448	0.986928	1.32719	0.0741251
Disease - Primary	Stroke	Logistic		Overall				0.915133
Disease - Primary	Type II Diabetes	Logistic	OR	e2e2	0.927722	0.772714	1.11383	0.421235
Disease - Primary	Type II Diabetes	Logistic	OR	e2e3	0.974664	0.932613	1.01861	0.254105
Disease - Primary	Type II Diabetes	Logistic	OR	e2e4	0.980326	0.894996	1.07379	0.6689
Disease - Primary	Type II Diabetes	Logistic	OR	e3e4	0.922245	0.890659	0.95495	5.30127e-06
Disease - Primary	Type II Diabetes	Logistic	OR	e4e4	0.824016	0.745282	0.911067	0.000158291
Disease - Primary	Type II Diabetes	Logistic		Overall				0.388281
Disease - Secondary	AMD	Logistic	OR	e2e2	0.853036	0.527349	1.37986	0.517126
Disease - Secondary	AMD	Logistic	OR	e2e3	0.979043	0.876407	1.0937	0.707779
Disease - Secondary	AMD	Logistic	OR	e2e4	0.849391	0.66452	1.08569	0.192424
Disease - Secondary	AMD	Logistic	OR	e3e4	0.944375	0.865379	1.03058	0.199105
Disease - Secondary	AMD	Logistic	OR	e4e4	0.771419	0.591701	1.00572	0.055138
Disease - Secondary	AMD	Logistic		Overall				0.754726
Disease - Secondary	Bladder Cancer	Logistic	OR	e2e2	1.19068	0.754553	1.8789	0.45332
Disease - Secondary	Bladder Cancer	Logistic	OR	e2e3	0.927983	0.818752	1.05179	0.242094
Disease - Secondary	Bladder Cancer	Logistic	OR	e2e4	1.02694	0.801176	1.31632	0.833778
Disease - Secondary	Bladder Cancer	Logistic	OR	e3e4	0.967788	0.87916	1.06535	0.504028
Disease - Secondary	Bladder Cancer	Logistic	OR	e4e4	0.950785	0.730171	1.23806	0.707914
Disease - Secondary	Bladder Cancer	Logistic		Overall				0.367478
Disease - Secondary	Delirium	Logistic	OR	e2e2	1.22873	0.581668	2.59559	0.589307
Disease - Secondary	Delirium	Logistic	OR	e2e3	0.922298	0.750133	1.13398	0.442912
Disease - Secondary	Delirium	Logistic	OR	e2e4	1.05777	0.707705	1.581	0.784157
Disease - Secondary	Delirium	Logistic	OR	e3e4	1.60597	1.40572	1.83474	3.12683e-12
Disease - Secondary	Delirium	Logistic	OR	e4e4	3.48244	2.7383	4.42881	2.62287e-24
Disease - Secondary	Delirium	Logistic		Overall				0.63477
Disease - Secondary	Dementia	Logistic	OR	e2e2	1.00948	0.478249	2.13078	0.980258
Disease - Secondary	Dementia	Logistic	OR	e2e3	0.845996	0.695718	1.02874	0.0937297
Disease - Secondary	Dementia	Logistic	OR	e2e4	1.38556	1.00175	1.91641	0.0487781
Disease - Secondary	Dementia	Logistic	OR	e3e4	2.4939	2.23848	2.77847	1.03053e-61
Disease - Secondary	Dementia	Logistic	OR	e4e4	7.76929	6.611	9.13051	9.61183e-137
Disease - Secondary	Dementia	Logistic		Overall				0.231353
Disease - Secondary	Lung Cancer	Logistic	OR	e2e2	1.3964	0.922698	2.1133	0.114244
Disease - Secondary	Lung Cancer	Logistic	OR	e2e3	0.930369	0.822197	1.05277	0.25243
Disease - Secondary	Lung Cancer	Logistic	OR	e2e4	1.1058	0.872064	1.40218	0.406502
Disease - Secondary	Lung Cancer	Logistic	OR	e3e4	1.04296	0.951618	1.14307	0.368411
Disease - Secondary	Lung Cancer	Logistic	OR	e4e4	1.07957	0.844345	1.38032	0.541467
Disease - Secondary	Lung Cancer	Logistic		Overall				0.153845
Disease - Secondary	Parkinson's Disease	Logistic	OR	e2e2	0.944199	0.48856	1.82477	0.864379
Disease - Secondary	Parkinson's Disease	Logistic	OR	e2e3	0.98534	0.841572	1.15367	0.854378
Disease - Secondary	Parkinson's Disease	Logistic	OR	e2e4	1.1132	0.81872	1.5136	0.493925
Disease - Secondary	Parkinson's Disease	Logistic	OR	e3e4	1.02976	0.91241	1.16219	0.63478
Disease - Secondary	Parkinson's Disease	Logistic	OR	e4e4	0.9814	0.702464	1.3711	0.912373
Disease - Secondary	Parkinson's Disease	Logistic		Overall				0.969989
Disease - Secondary	Type I Diabetes	Logistic	OR	e2e2	1.08991	0.707303	1.67948	0.696345
Disease - Secondary	Type I Diabetes	Logistic	OR	e2e3	0.949777	0.847058	1.06495	0.377589
Disease - Secondary	Type I Diabetes	Logistic	OR	e2e4	0.911102	0.715619	1.15998	0.449913
Disease - Secondary	Type I Diabetes	Logistic	OR	e3e4	0.933967	0.854297	1.02107	0.133183
Disease - Secondary	Type I Diabetes	Logistic	OR	e4e4	0.986039	0.77697	1.25136	0.907938
Disease - Secondary	Type I Diabetes	Logistic		Overall				0.616559
Hematology	Basophill Count	Linear	SD	e2e2	0.0422423	0.00440379	0.0800808	0.028665
Hematology	Basophill Count	Linear	SD	e2e3	0.00932497	-6.90573e-05	0.018719	0.0517089
Hematology	Basophill Count	Linear	SD	e2e4	0.000973826	-0.0183568	0.0203044	0.921346
Hematology	Basophill Count	Linear	SD	e3e4	0.00400359	-0.00328004	0.0112872	0.281332
Hematology	Basophill Count	Linear	SD	e4e4	-0.014386	-0.0341813	0.00540919	0.154335
Hematology	Basophill Count	Linear		Overall				0.0164047
Hematology	Basophill Percentage	Linear	SD	e2e2	0.0288247	-0.0119012	0.0695505	0.165378
Hematology	Basophill Percentage	Linear	SD	e2e3	0.011578	0.00146718	0.0216889	0.024809
Hematology	Basophill Percentage	Linear	SD	e2e4	0.00719435	-0.0136113	0.028	0.497941
Hematology	Basophill Percentage	Linear	SD	e3e4	0.00750804	-0.000331344	0.0153474	0.060502
Hematology	Basophill Percentage	Linear	SD	e4e4	-0.00661431	-0.02792	0.0146914	0.542879
Hematology	Basophill Percentage	Linear		Overall				0.0349953
Hematology	Eosinophill Count	Linear	SD	e2e2	-0.0699482	-0.11057	-0.0293265	0.00073839
Hematology	Eosinophill Count	Linear	SD	e2e3	-0.0275624	-0.0376474	-0.0174774	8.48532e-08
Hematology	Eosinophill Count	Linear	SD	e2e4	-0.0335826	-0.0543351	-0.0128302	0.00151556
Hematology	Eosinophill Count	Linear	SD	e3e4	-0.00994096	-0.0177603	-0.00212158	0.012712
Hematology	Eosinophill Count	Linear	SD	e4e4	-0.0220532	-0.0433044	-0.00080189	0.0419603
Hematology	Eosinophill Count	Linear		Overall				4.16774e-09
Hematology	Eosinophill Percentage	Linear	SD	e2e2	-0.0835302	-0.124173	-0.0428875	5.62203e-05
Hematology	Eosinophill Percentage	Linear	SD	e2e3	-0.0285201	-0.0386103	-0.0184299	3.02906e-08
Hematology	Eosinophill Percentage	Linear	SD	e2e4	-0.0341656	-0.0549288	-0.0134025	0.00125936
Hematology	Eosinophill Percentage	Linear	SD	e3e4	-0.00661473	-0.0144381	0.00120865	0.0974867
Hematology	Eosinophill Percentage	Linear	SD	e4e4	-0.0103337	-0.031596	0.0109285	0.340808
Hematology	Eosinophill Percentage	Linear		Overall				1.63357e-10
Hematology	Hematocrit Percentage	Linear	SD	e2e2	-0.00407054	-0.0372072	0.0290661	0.809738
Hematology	Hematocrit Percentage	Linear	SD	e2e3	0.00775423	-0.000473437	0.0159819	0.0647213
Hematology	Hematocrit Percentage	Linear	SD	e2e4	-0.00810785	-0.0250388	0.00882313	0.347947
Hematology	Hematocrit Percentage	Linear	SD	e3e4	-0.0123491	-0.0187272	-0.00597104	0.000147762
Hematology	Hematocrit Percentage	Linear	SD	e4e4	-0.0264703	-0.0438105	-0.00913006	0.00277234
Hematology	Hematocrit Percentage	Linear		Overall				0.172476
Hematology	Hemoglobin Concentration	Linear	SD	e2e2	-0.0237791	-0.0562027	0.00864453	0.150601
Hematology	Hemoglobin Concentration	Linear	SD	e2e3	0.00713964	-0.000910985	0.0151903	0.0821799
Hematology	Hemoglobin Concentration	Linear	SD	e2e4	-0.00651224	-0.0230789	0.0100544	0.441035
Hematology	Hemoglobin Concentration	Linear	SD	e3e4	-0.00642118	-0.012662	-0.000180321	0.0437386
Hematology	Hemoglobin Concentration	Linear	SD	e4e4	-0.0159902	-0.0329573	0.000976857	0.0647303
Hematology	Hemoglobin Concentration	Linear		Overall				0.0701916
Hematology	High Light Scatter Reticulocyte Count	Linear	SD	e2e2	-0.299005	-0.339634	-0.258375	3.77571e-47
Hematology	High Light Scatter Reticulocyte Count	Linear	SD	e2e3	-0.0423122	-0.0524186	-0.0322057	2.30032e-16
Hematology	High Light Scatter Reticulocyte Count	Linear	SD	e2e4	-0.0676049	-0.0883891	-0.0468207	1.82963e-10
Hematology	High Light Scatter Reticulocyte Count	Linear	SD	e3e4	-0.00535322	-0.0131861	0.00247965	0.18041
Hematology	High Light Scatter Reticulocyte Count	Linear	SD	e4e4	-0.0391353	-0.0604218	-0.0178487	0.00031414
Hematology	High Light Scatter Reticulocyte Count	Linear		Overall				2.17574e-58
Hematology	High Light Scatter Reticulocyte Percentage	Linear	SD	e2e2	-0.31233	-0.353248	-0.271412	1.37425e-50
Hematology	High Light Scatter Reticulocyte Percentage	Linear	SD	e2e3	-0.044857	-0.055035	-0.0346789	5.74295e-18
Hematology	High Light Scatter Reticulocyte Percentage	Linear	SD	e2e4	-0.0666682	-0.0875996	-0.0457367	4.30773e-10
Hematology	High Light Scatter Reticulocyte Percentage	Linear	SD	e3e4	-0.00344588	-0.0113342	0.00444248	0.391903
Hematology	High Light Scatter Reticulocyte Percentage	Linear	SD	e4e4	-0.0360324	-0.0574698	-0.014595	0.000986606
Hematology	High Light Scatter Reticulocyte Percentage	Linear		Overall				3.38781e-63
Hematology	Immature Reticulocyte Fraction	Linear	SD	e2e2	-0.307371	-0.347783	-0.266958	3.06677e-50
Hematology	Immature Reticulocyte Fraction	Linear	SD	e2e3	-0.0458593	-0.0559117	-0.0358069	3.86064e-19
Hematology	Immature Reticulocyte Fraction	Linear	SD	e2e4	-0.0805621	-0.101235	-0.059889	2.21353e-14
Hematology	Immature Reticulocyte Fraction	Linear	SD	e3e4	-0.0154132	-0.0232042	-0.00762219	0.000105571
Hematology	Immature Reticulocyte Fraction	Linear	SD	e4e4	-0.0580125	-0.0791853	-0.0368398	7.86883e-08
Hematology	Immature Reticulocyte Fraction	Linear		Overall				6.23106e-64
Hematology	Lymphocyte Count	Linear	SD	e2e2	-0.0319783	-0.0724759	0.00851931	0.121706
Hematology	Lymphocyte Count	Linear	SD	e2e3	0.0116436	0.0015894	0.0216978	0.0232202
Hematology	Lymphocyte Count	Linear	SD	e2e4	-0.00211112	-0.0228002	0.0185779	0.841484
Hematology	Lymphocyte Count	Linear	SD	e3e4	-0.00533899	-0.0131345	0.0024565	0.179485
Hematology	Lymphocyte Count	Linear	SD	e4e4	-0.018092	-0.0392784	0.00309434	0.0941895
Hematology	Lymphocyte Count	Linear		Overall				0.0195921
Hematology	Lymphocyte Percentage	Linear	SD	e2e2	-0.0778473	-0.118315	-0.0373796	0.00016304
Hematology	Lymphocyte Percentage	Linear	SD	e2e3	0.0122485	0.00220175	0.0222953	0.0168723
Hematology	Lymphocyte Percentage	Linear	SD	e2e4	0.00205008	-0.0186237	0.0227239	0.845897
Hematology	Lymphocyte Percentage	Linear	SD	e3e4	0.00174341	-0.00604631	0.00953313	0.66091
Hematology	Lymphocyte Percentage	Linear	SD	e4e4	0.00932979	-0.0118409	0.0305005	0.38773
Hematology	Lymphocyte Percentage	Linear		Overall				3.13351e-05
Hematology	Mean Corpuscular Hemoglobin	Linear	SD	e2e2	-0.0678041	-0.10765	-0.0279584	0.000852454
Hematology	Mean Corpuscular Hemoglobin	Linear	SD	e2e3	-2.28558e-05	-0.00991645	0.00987074	0.996387
Hematology	Mean Corpuscular Hemoglobin	Linear	SD	e2e4	0.00589813	-0.0144619	0.0262581	0.570181
Hematology	Mean Corpuscular Hemoglobin	Linear	SD	e3e4	0.0183088	0.0106393	0.0259783	2.88587e-06
Hematology	Mean Corpuscular Hemoglobin	Linear	SD	e4e4	0.0322821	0.0114311	0.0531332	0.0024098
Hematology	Mean Corpuscular Hemoglobin	Linear		Overall				0.00380495
Hematology	Mean Corpuscular Hemoglobin Concentration	Linear	SD	e2e2	-0.141565	-0.181873	-0.101258	5.84335e-12
Hematology	Mean Corpuscular Hemoglobin Concentration	Linear	SD	e2e3	-0.00915038	-0.0191586	0.000857805	0.0731378
Hematology	Mean Corpuscular Hemoglobin Concentration	Linear	SD	e2e4	-0.00623141	-0.0268263	0.0143635	0.553163
Hematology	Mean Corpuscular Hemoglobin Concentration	Linear	SD	e3e4	0.00737697	-0.000381428	0.0151354	0.0623779
Hematology	Mean Corpuscular Hemoglobin Concentration	Linear	SD	e4e4	0.0154679	-0.00562479	0.0365607	0.150633
Hematology	Mean Corpuscular Hemoglobin Concentration	Linear		Overall				1.67968e-11
Hematology	Mean Corpuscular Volume	Linear	SD	e2e2	-0.123766	-0.163903	-0.0836288	1.50759e-09
Hematology	Mean Corpuscular Volume	Linear	SD	e2e3	-0.00956732	-0.0195332	0.000398519	0.0598928
Hematology	Mean Corpuscular Volume	Linear	SD	e2e4	-0.00904653	-0.0295554	0.0114623	0.387288
Hematology	Mean Corpuscular Volume	Linear	SD	e3e4	-0.00286856	-0.0105941	0.00485698	0.466766
Hematology	Mean Corpuscular Volume	Linear	SD	e4e4	-0.00164123	-0.0226447	0.0193623	0.878278
Hematology	Mean Corpuscular Volume	Linear		Overall				3.14382e-09
Hematology	Mean Platelet Volume	Linear	SD	e2e2	0.113425	0.0726521	0.154198	4.97392e-08
Hematology	Mean Platelet Volume	Linear	SD	e2e3	-0.00420027	-0.014324	0.0059235	0.416119
Hematology	Mean Platelet Volume	Linear	SD	e2e4	-0.0166147	-0.0374475	0.0042181	0.118025
Hematology	Mean Platelet Volume	Linear	SD	e3e4	-0.0117628	-0.0196109	-0.00391475	0.00330757
Hematology	Mean Platelet Volume	Linear	SD	e4e4	-0.0344043	-0.0557406	-0.0130679	0.00157571
Hematology	Mean Platelet Volume	Linear		Overall				2.02154e-07
Hematology	Mean Reticulocyte Volume	Linear	SD	e2e2	0.091729	0.0513578	0.1321	8.45836e-06
Hematology	Mean Reticulocyte Volume	Linear	SD	e2e3	0.0274529	0.0174108	0.0374951	8.41543e-08
Hematology	Mean Reticulocyte Volume	Linear	SD	e2e4	0.0170078	-0.00364419	0.0376597	0.106504
Hematology	Mean Reticulocyte Volume	Linear	SD	e3e4	-0.0268022	-0.0345852	-0.0190191	1.48607e-11
Hematology	Mean Reticulocyte Volume	Linear	SD	e4e4	-0.0584901	-0.0796412	-0.037339	5.96457e-08
Hematology	Mean Reticulocyte Volume	Linear		Overall				7.74851e-11
Hematology	Mean Sphered Cell Volume	Linear	SD	e2e2	0.128689	0.0889856	0.168392	2.11694e-10
Hematology	Mean Sphered Cell Volume	Linear	SD	e2e3	0.0419033	0.0320274	0.0517792	9.12255e-17
Hematology	Mean Sphered Cell Volume	Linear	SD	e2e4	0.0220321	0.00172202	0.0423422	0.0334921
Hematology	Mean Sphered Cell Volume	Linear	SD	e3e4	-0.0340943	-0.0417485	-0.0264401	2.5497e-18
Hematology	Mean Sphered Cell Volume	Linear	SD	e4e4	-0.0587365	-0.0795375	-0.0379355	3.12486e-08
Hematology	Mean Sphered Cell Volume	Linear		Overall				1.4849e-23
Hematology	Monocyte Count	Linear	SD	e2e2	0.0384299	-0.00106766	0.0779274	0.0565235
Hematology	Monocyte Count	Linear	SD	e2e3	-0.000776406	-0.0105823	0.0090295	0.876676
Hematology	Monocyte Count	Linear	SD	e2e4	-0.0145211	-0.0346993	0.00565698	0.158398
Hematology	Monocyte Count	Linear	SD	e3e4	-0.0154327	-0.0230357	-0.00782977	6.93954e-05
Hematology	Monocyte Count	Linear	SD	e4e4	-0.0377093	-0.0583725	-0.0170462	0.000347805
Hematology	Monocyte Count	Linear		Overall				0.15778
Hematology	Monocyte Percentage	Linear	SD	e2e2	-0.000613553	-0.0400829	0.0388558	0.975694
Hematology	Monocyte Percentage	Linear	SD	e2e3	-0.00271067	-0.0125096	0.00708823	0.587692
Hematology	Monocyte Percentage	Linear	SD	e2e4	-0.0157776	-0.0359413	0.00438614	0.125124
Hematology	Monocyte Percentage	Linear	SD	e3e4	-0.0088236	-0.0164211	-0.00122608	0.022831
Hematology	Monocyte Percentage	Linear	SD	e4e4	-0.0198963	-0.0405447	0.000752114	0.0589499
Hematology	Monocyte Percentage	Linear		Overall				0.863288
Hematology	Neutrophill Count	Linear	SD	e2e2	0.0657284	0.0250019	0.106455	0.00156067
Hematology	Neutrophill Count	Linear	SD	e2e3	0.00027287	-0.00983815	0.0103839	0.957816
Hematology	Neutrophill Count	Linear	SD	e2e4	-0.000147893	-0.0209539	0.0206581	0.988884
Hematology	Neutrophill Count	Linear	SD	e3e4	-0.00679789	-0.0146374	0.00104165	0.0892183
Hematology	Neutrophill Count	Linear	SD	e4e4	-0.0244488	-0.0457549	-0.00314277	0.0245086
Hematology	Neutrophill Count	Linear		Overall				0.00669559
Hematology	Neutrophill Percentage	Linear	SD	e2e2	0.0795106	0.0386703	0.120351	0.000135772
Hematology	Neutrophill Percentage	Linear	SD	e2e3	-0.00432846	-0.0144677	0.0058108	0.402756
Hematology	Neutrophill Percentage	Linear	SD	e2e4	0.00870431	-0.0121598	0.0295684	0.413542
Hematology	Neutrophill Percentage	Linear	SD	e3e4	0.00157836	-0.00628307	0.00943978	0.693946
Hematology	Neutrophill Percentage	Linear	SD	e4e4	-0.00138626	-0.0227519	0.0199794	0.898807
Hematology	Neutrophill Percentage	Linear		Overall				0.000417012
Hematology	Nucleated Red Blood Cell Count	Linear	SD	e2e2	0.0478038	0.00694996	0.0886577	0.0218262
Hematology	Nucleated Red Blood Cell Count	Linear	SD	e2e3	0.00317817	-0.00696458	0.0133209	0.539121
Hematology	Nucleated Red Blood Cell Count	Linear	SD	e2e4	0.00687637	-0.0139958	0.0277485	0.518465
Hematology	Nucleated Red Blood Cell Count	Linear	SD	e3e4	0.00540363	-0.00246049	0.0132677	0.178065
Hematology	Nucleated Red Blood Cell Count	Linear	SD	e4e4	0.00392722	-0.0174455	0.0252999	0.718741
Hematology	Nucleated Red Blood Cell Count	Linear		Overall				0.063121
Hematology	Nucleated Red Blood Cell Percentage	Linear	SD	e2e2	0.0475773	0.00672441	0.0884303	0.022456
Hematology	Nucleated Red Blood Cell Percentage	Linear	SD	e2e3	0.00377433	-0.0063682	0.0139169	0.465782
Hematology	Nucleated Red Blood Cell Percentage	Linear	SD	e2e4	0.00747862	-0.0133931	0.0283503	0.482503
Hematology	Nucleated Red Blood Cell Percentage	Linear	SD	e3e4	0.00568328	-0.00218069	0.0135473	0.156641
Hematology	Nucleated Red Blood Cell Percentage	Linear	SD	e4e4	0.00356551	-0.0178067	0.0249377	0.743684
Hematology	Nucleated Red Blood Cell Percentage	Linear		Overall				0.0605454
Hematology	Platelet Count	Linear	SD	e2e2	0.0143537	-0.024831	0.0535384	0.472788
Hematology	Platelet Count	Linear	SD	e2e3	0.0261478	0.0164184	0.0358772	1.38427e-07
Hematology	Platelet Count	Linear	SD	e2e4	0.0176667	-0.00235448	0.037688	0.0837252
Hematology	Platelet Count	Linear	SD	e3e4	-0.0233522	-0.0308945	-0.0158099	1.29315e-09
Hematology	Platelet Count	Linear	SD	e4e4	-0.0602292	-0.0807344	-0.0397241	8.5715e-09
Hematology	Platelet Count	Linear		Overall				8.37466e-07
Hematology	Platelet Crit	Linear	SD	e2e2	0.0757063	0.0373714	0.114041	0.000108556
Hematology	Platelet Crit	Linear	SD	e2e3	0.0270515	0.0175331	0.0365699	2.54517e-08
Hematology	Platelet Crit	Linear	SD	e2e4	0.0112366	-0.00835042	0.0308236	0.260851
Hematology	Platelet Crit	Linear	SD	e3e4	-0.0326201	-0.0399988	-0.0252413	4.54759e-18
Hematology	Platelet Crit	Linear	SD	e4e4	-0.0864414	-0.106502	-0.066381	3.03619e-17
Hematology	Platelet Crit	Linear		Overall				2.48902e-10
Hematology	Platelet Distribution Width	Linear	SD	e2e2	0.0582468	0.0179571	0.0985365	0.00460408
Hematology	Platelet Distribution Width	Linear	SD	e2e3	0.0217991	0.0117954	0.0318029	1.94688e-05
Hematology	Platelet Distribution Width	Linear	SD	e2e4	0.0314518	0.010866	0.0520376	0.002749
Hematology	Platelet Distribution Width	Linear	SD	e3e4	0.0261672	0.0184122	0.0339223	3.76236e-11
Hematology	Platelet Distribution Width	Linear	SD	e4e4	0.0483327	0.0272493	0.0694161	7.0204e-06
Hematology	Platelet Distribution Width	Linear		Overall				3.25431e-06
Hematology	Red Blood Cell Count	Linear	SD	e2e2	0.0622722	0.0273137	0.0972308	0.000480704
Hematology	Red Blood Cell Count	Linear	SD	e2e3	0.0112042	0.00252419	0.0198843	0.011409
Hematology	Red Blood Cell Count	Linear	SD	e2e4	-0.00459651	-0.0224584	0.0132654	0.614002
Hematology	Red Blood Cell Count	Linear	SD	e3e4	-0.00934482	-0.0160736	-0.00261603	0.00648983
Hematology	Red Blood Cell Count	Linear	SD	e4e4	-0.023689	-0.0419826	-0.00539538	0.0111485
Hematology	Red Blood Cell Count	Linear		Overall				0.000132363
Hematology	Red Blood Cell Distribution Width	Linear	SD	e2e2	0.430684	0.390178	0.471191	2.16337e-96
Hematology	Red Blood Cell Distribution Width	Linear	SD	e2e3	0.0654361	0.0553786	0.0754936	3.0982e-37
Hematology	Red Blood Cell Distribution Width	Linear	SD	e2e4	0.0153416	-0.00535592	0.0360391	0.146285
Hematology	Red Blood Cell Distribution Width	Linear	SD	e3e4	-0.0449612	-0.0527578	-0.0371646	1.28756e-29
Hematology	Red Blood Cell Distribution Width	Linear	SD	e4e4	-0.0919159	-0.113113	-0.0707192	1.91849e-17
Hematology	Red Blood Cell Distribution Width	Linear		Overall				1.71585e-125
Hematology	Reticulocyte Count	Linear	SD	e2e2	-0.221237	-0.261671	-0.180804	7.90405e-27
Hematology	Reticulocyte Count	Linear	SD	e2e3	-0.0305695	-0.040627	-0.0205119	2.56814e-09
Hematology	Reticulocyte Count	Linear	SD	e2e4	-0.0460665	-0.0667502	-0.0253829	1.2703e-05
Hematology	Reticulocyte Count	Linear	SD	e3e4	0.00258301	-0.00521197	0.010378	0.516034
Hematology	Reticulocyte Count	Linear	SD	e4e4	-0.0229561	-0.0441397	-0.00177252	0.033674
Hematology	Reticulocyte Count	Linear		Overall				2.9289e-32
Hematology	Reticulocyte Percentage	Linear	SD	e2e2	-0.242714	-0.283663	-0.201764	3.42494e-31
Hematology	Reticulocyte Percentage	Linear	SD	e2e3	-0.0343309	-0.0445171	-0.0241448	3.95963e-11
Hematology	Reticulocyte Percentage	Linear	SD	e2e4	-0.0454276	-0.0663754	-0.0244797	2.13465e-05
Hematology	Reticulocyte Percentage	Linear	SD	e3e4	0.00491686	-0.00297769	0.0128114	0.222201
Hematology	Reticulocyte Percentage	Linear	SD	e4e4	-0.0190456	-0.0404998	0.00240856	0.0818724
Hematology	Reticulocyte Percentage	Linear		Overall				3.979e-38
Hematology	White Blood Cell Count	Linear	SD	e2e2	0.0468482	0.00624092	0.0874556	0.0237481
Hematology	White Blood Cell Count	Linear	SD	e2e3	0.00206622	-0.0080164	0.0121488	0.68794
Hematology	White Blood Cell Count	Linear	SD	e2e4	-0.00499711	-0.0257452	0.015751	0.636891
Hematology	White Blood Cell Count	Linear	SD	e3e4	-0.00888869	-0.0167048	-0.00107262	0.0258189
Hematology	White Blood Cell Count	Linear	SD	e4e4	-0.0306088	-0.0518584	-0.00935917	0.00475479
Hematology	White Blood Cell Count	Linear		Overall				0.074068
Mortality	Age at Death	Cox	HR	e2e2	1.06481	0.874306	1.29682	0.532382
Mortality	Age at Death	Cox	HR	e2e3	0.960215	0.912867	1.01002	0.11559
Mortality	Age at Death	Cox	HR	e2e4	1.01724	0.918442	1.12666	0.743024
Mortality	Age at Death	Cox	HR	e3e4	1.05804	1.01861	1.099	0.00359738
Mortality	Age at Death	Cox	HR	e4e4	1.17273	1.06338	1.29332	0.00142037
Mortality	Age at Death	Cox		Overall				0.226538
Physical Measure	Any Fall in the Last Year	Logistic	OR	e2e2	1.05799	0.956396	1.17037	0.273789
Physical Measure	Any Fall in the Last Year	Logistic	OR	e2e3	1.02918	1.00351	1.0555	0.025598
Physical Measure	Any Fall in the Last Year	Logistic	OR	e2e4	1.01749	0.965822	1.07193	0.514309
Physical Measure	Any Fall in the Last Year	Logistic	OR	e3e4	1.03546	1.01539	1.05593	0.000483652
Physical Measure	Any Fall in the Last Year	Logistic	OR	e4e4	1.05475	1.00046	1.11198	0.0480246
Physical Measure	Any Fall in the Last Year	Logistic		Overall				0.0510329
Physical Measure	BMI	Linear	SD	e2e2	0.0658522	0.0259596	0.105745	0.0012149
Physical Measure	BMI	Linear	SD	e2e3	0.0207906	0.0108816	0.0306996	3.91791e-05
Physical Measure	BMI	Linear	SD	e2e4	-0.0117933	-0.0321689	0.00858232	0.256621
Physical Measure	BMI	Linear	SD	e3e4	-0.0135348	-0.0212159	-0.0058537	0.000553143
Physical Measure	BMI	Linear	SD	e4e4	-0.0735389	-0.0944107	-0.0526671	5.00458e-12
Physical Measure	BMI	Linear		Overall				1.96697e-06
Physical Measure	Depressed Mood in the Last 2 Weeks	Logistic	OR	e2e2	1.23026	1.02371	1.47848	0.0271143
Physical Measure	Depressed Mood in the Last 2 Weeks	Logistic	OR	e2e3	0.998836	0.95024	1.04992	0.9635
Physical Measure	Depressed Mood in the Last 2 Weeks	Logistic	OR	e2e4	0.990347	0.893493	1.0977	0.853447
Physical Measure	Depressed Mood in the Last 2 Weeks	Logistic	OR	e3e4	1.0059	0.967884	1.04541	0.764692
Physical Measure	Depressed Mood in the Last 2 Weeks	Logistic	OR	e4e4	1.02928	0.92756	1.14216	0.586713
Physical Measure	Depressed Mood in the Last 2 Weeks	Logistic		Overall				0.098524
Physical Measure	Diastolic Blood Pressure	Linear	SD	e2e2	0.0172185	-0.0237102	0.0581472	0.40963
Physical Measure	Diastolic Blood Pressure	Linear	SD	e2e3	0.0033376	-0.00681029	0.0134855	0.519171
Physical Measure	Diastolic Blood Pressure	Linear	SD	e2e4	-0.0196844	-0.0405001	0.00113127	0.0638193
Physical Measure	Diastolic Blood Pressure	Linear	SD	e3e4	-0.0192255	-0.0270983	-0.0113526	1.70012e-06
Physical Measure	Diastolic Blood Pressure	Linear	SD	e4e4	-0.0328275	-0.0542567	-0.0113984	0.00267802
Physical Measure	Diastolic Blood Pressure	Linear		Overall				0.5911
Physical Measure	FEV1	Linear	SD	e2e2	0.014291	-0.0203896	0.0489717	0.419292
Physical Measure	FEV1	Linear	SD	e2e3	0.00585376	-0.00287662	0.0145841	0.188792
Physical Measure	FEV1	Linear	SD	e2e4	0.0195196	0.00157897	0.0374602	0.0329699
Physical Measure	FEV1	Linear	SD	e3e4	0.00386709	-0.00288861	0.0106228	0.261898
Physical Measure	FEV1	Linear	SD	e4e4	0.0168859	-0.00138416	0.0351559	0.0700685
Physical Measure	FEV1	Linear		Overall				0.318072
Physical Measure	FEV1/FVC Ratio	Linear	SD	e2e2	0.0387121	-0.00907675	0.086501	0.112356
Physical Measure	FEV1/FVC Ratio	Linear	SD	e2e3	0.00224401	-0.00978619	0.0142742	0.714668
Physical Measure	FEV1/FVC Ratio	Linear	SD	e2e4	-0.0110417	-0.0357633	0.01368	0.381359
Physical Measure	FEV1/FVC Ratio	Linear	SD	e3e4	-0.00226152	-0.0115707	0.00704763	0.633972
Physical Measure	FEV1/FVC Ratio	Linear	SD	e4e4	-0.0165723	-0.0417479	0.00860324	0.196987
Physical Measure	FEV1/FVC Ratio	Linear		Overall				0.271349
Physical Measure	Fried Frailty	Logistic	OR	e2e2	1.12412	0.799412	1.58073	0.501116
Physical Measure	Fried Frailty	Logistic	OR	e2e3	1.00132	0.917863	1.09236	0.976328
Physical Measure	Fried Frailty	Logistic	OR	e2e4	0.881446	0.728087	1.06711	0.19568
Physical Measure	Fried Frailty	Logistic	OR	e3e4	1.0243	0.957942	1.09526	0.482267
Physical Measure	Fried Frailty	Logistic	OR	e4e4	0.861304	0.706627	1.04984	0.139305
Physical Measure	Fried Frailty	Logistic		Overall				0.80364
Physical Measure	FVC	Linear	SD	e2e2	0.00173879	-0.0320345	0.0355121	0.919624
Physical Measure	FVC	Linear	SD	e2e3	0.00564312	-0.00285885	0.0141451	0.19329
Physical Measure	FVC	Linear	SD	e2e4	0.0242226	0.00675134	0.0416938	0.00658126
Physical Measure	FVC	Linear	SD	e3e4	0.0046604	-0.00191854	0.0112394	0.165016
Physical Measure	FVC	Linear	SD	e4e4	0.0245925	0.00680041	0.0423845	0.00674718
Physical Measure	FVC	Linear		Overall				0.428632
Physical Measure	Heel BMD	Linear	SD	e2e2	0.0228813	-0.0288831	0.0746457	0.386294
Physical Measure	Heel BMD	Linear	SD	e2e3	0.0134764	0.000659965	0.0262928	0.0393147
Physical Measure	Heel BMD	Linear	SD	e2e4	0.0193733	-0.00674958	0.0454962	0.146072
Physical Measure	Heel BMD	Linear	SD	e3e4	0.00544635	-0.00450926	0.015402	0.28362
Physical Measure	Heel BMD	Linear	SD	e4e4	-0.00654427	-0.0333131	0.0202246	0.631826
Physical Measure	Heel BMD	Linear		Overall				0.0884033
Physical Measure	Maximal Grip Strength	Linear	SD	e2e2	-0.00789153	-0.0334771	0.017694	0.545495
Physical Measure	Maximal Grip Strength	Linear	SD	e2e3	-0.00522803	-0.0115838	0.00112779	0.106923
Physical Measure	Maximal Grip Strength	Linear	SD	e2e4	-0.00899469	-0.0220628	0.00407344	0.177329
Physical Measure	Maximal Grip Strength	Linear	SD	e3e4	-0.00111549	-0.006042	0.00381101	0.657196
Physical Measure	Maximal Grip Strength	Linear	SD	e4e4	-0.00975849	-0.0231516	0.00363458	0.153272
Physical Measure	Maximal Grip Strength	Linear		Overall				0.236242
Physical Measure	Systolic Blood Pressure	Linear	SD	e2e2	-0.0167074	-0.0555619	0.0221471	0.399351
Physical Measure	Systolic Blood Pressure	Linear	SD	e2e3	-0.0154681	-0.0250996	-0.00583664	0.00164579
Physical Measure	Systolic Blood Pressure	Linear	SD	e2e4	-0.0318079	-0.0515643	-0.0120515	0.00160207
Physical Measure	Systolic Blood Pressure	Linear	SD	e3e4	-0.000186328	-0.00765863	0.00728597	0.96102
Physical Measure	Systolic Blood Pressure	Linear	SD	e4e4	0.00558208	-0.0147578	0.0259219	0.590651
Physical Measure	Systolic Blood Pressure	Linear		Overall				0.00549249
